1 Full Title: Intranasal oxytocin reduces pre-courtship aggression and increases paternal response  
2 in California mice (*Peromyscus californicus*)

3 Short Title: Oxytocin influences aggression and paternal behavior

4  
5 Caleigh D. Guoynes<sup>a\*</sup> & Catherine A. Marler<sup>a</sup>

6  
7 <sup>a</sup>Department of Psychology, University of Wisconsin-Madison – Madison, WI, USA

8 \*Corresponding author

9 Caleigh Guoynes email: [guoynes@wisc.edu](mailto:guoynes@wisc.edu)

10 Catherine Marler email: [catherine.marler@wisc.edu](mailto:catherine.marler@wisc.edu)

11

12

13 **HIGHLIGHTS**

14

- 15 • IN OXT attenuates male aggression during pre-courtship encounters
- 16 • IN OXT does not attenuate male aggression during resident intruder encounters
- 17 • IN OXT increases paternal responsiveness during a paternal care challenge
- 18 • IN OXT in fathers does not influence total paternal care or vocalizations

19

20

21

22

23

## 24 GRAPHICAL ABSTRACT

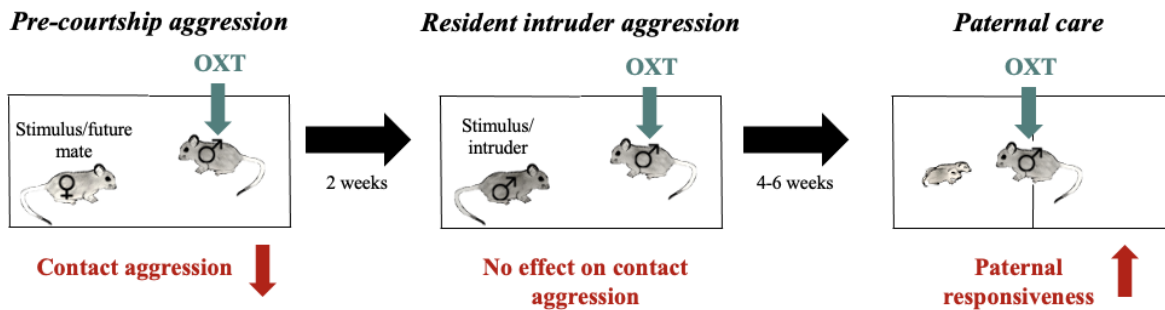

25

## 26 ABSTRACT

27 Oxytocin (OXT) is a neuropeptide that can facilitate prosocial behavior and decrease  
28 social stress and anxiety. We investigated whether acute pulses of intranasal (IN) OXT  
29 influenced social behavior during social challenges that are likely to occur throughout the  
30 lifespan of a wild mouse. To test this, we examined the acute effects of IN OXT in the male  
31 California mouse (*Peromyscus californicus*), a monogamous, biparental, and territorial rodent,  
32 using a within-subjects longitudinal design. Social challenges included a pre-courtship male-  
33 female encounter conducted during the initial aggressive and not the following affiliative phase  
34 of courtship, same-sex resident intruder test, and parental care test, with each test and dose  
35 separated by at least two weeks. Males were treated with intranasal infusions of 0.8 IU/kg OXT  
36 or saline controls 5-min before each behavioral test, receiving a total of three treatments of either  
37 IN OXT or saline control. We predicted that IN OXT would 1) decrease aggression and increase  
38 affiliation during the pre-courtship aggression phase, 2) increase aggression during resident  
39 intruder paradigms and 3) increase paternal care and vocalizations during a paternal care test. As  
40 predicted, during pre-courtship aggression with a novel female, IN OXT males displayed less  
41 contact aggression than control males, although with no change in affiliative behavior. However,

42 post-pairing, during the resident intruder test, IN OXT males did not differ from control males in  
43 contact aggression. During the paternal care test, IN OXT males were quicker to approach their  
44 pups than control males but did not differ in vocalizations produced, unlike our previous research  
45 demonstrating an effect on vocalizations in females. In summary, during pre-courtship  
46 aggression and the paternal care test, IN OXT promoted prosocial approach; however, during the  
47 resident intruder test IN OXT did not alter social approach. These data suggest that IN OXT  
48 promotes prosocial approach specifically in social contexts that can lead to affiliation.

49

50 Keywords: oxytocin, courtship, aggression, paternal care, monogamy, pair bonding

## 51 **1. Introduction**

52 In social species, interactions can be altered based on their life history stage and  
53 environment. Throughout the lifespan, social species encounter many different types of social  
54 interactions and must respond appropriately to these social interactions to acquire and maintain  
55 resources, mating opportunities, and reproductive fitness. One significant question is determining  
56 the mechanisms underlying how animals alter their social responses based on social and  
57 environmental context and life stage. Endogenous hormone and neuropeptide levels are  
58 important for biobehavioral feedback and to help animals respond appropriately to various social  
59 interactions. Oxytocin (OXT), a neuropeptide hormone, is a neuromodulator that may be  
60 important for weighing social salience and determining appropriate behavioral response to social  
61 stimuli (Shamay-Tsoory & Abu-Akel, 2016; Parr et al., 2018; Yao et al., 2018; Johnson et al.,  
62 2017; Egito et al., 2020). Previous studies on OXT show its significant effects on prosocial  
63 affiliative behaviors such as trust, social bonding, social recognition, and anxiolytic behavior in  
64 both human and animal models (Theodoridou et al., 2009; Kosfeld et al., 2005; Ring et al., 2006;  
65 Bales et al., 2003; Blocker et al., 2015; Guestella et al., 2008). In addition to increasing  
66 affiliative behaviors, OXT is involved in aggressive behaviors. In humans, OXT can increase  
67 envy, schadenfreude, defensive but not offensive aggression toward a competing out-group, and  
68 domestic violence in men prone to aggression (Shamay-Tsoory et al. 2009; Bethlehem et al.,  
69 2015; De Dreu et al., 2016; De Dreu et al., 2010; DeWall et al. 2014). OXT is also associated  
70 with increased mate guarding in rats (Holley et al., 2015), prairie voles (Bales & Carter 2003),  
71 and marmoset monkeys (Cavanaugh et al., 2018). Furthermore, OXT is associated with increased  
72 maternal aggression toward potential predators (Bosch & Neumann 2012). In canines, OXT also  
73 increases aggression towards owners but not strangers during a threatening approach test

74 (Hernadi et al., 2015). These data on the role of OXT on affiliative and aggressive behavior  
75 support the hypothesis that social salience and social context are important cues influencing the  
76 behavioral effects of OXT. Based on these studies, OXT would be expected to decrease  
77 aggression and increase affiliative behavior when a male-female pair is introduced and increase  
78 aggression by a resident towards an intruder .

79       Throughout an animal's lifetime, OXT levels change in response to certain life events  
80 such as early life experience, pair bonding, intrasexual aggression, and parenting. This is  
81 especially true for monogamous and parental species that require flexibility in response to group  
82 membership. In prairie voles, the function of OXT can be altered in response to previous social  
83 neglect by their mother during the neonatal period (Bosch and Young, 2017). Prior to mating,  
84 OXT increases affiliative contact with familiar females (Cho et al. 1999; Bales et al., 2013) and  
85 increases speed of pair bonding in females (Williams et al., 1994; Young & Wang, 2004). Post-  
86 mating, OXT enhances aggression in prairie voles during encounters with same-sex conspecifics  
87 (Winslow et al. 1993). In California mice, OXT plasma levels increase in expectant fathers,  
88 decrease in fathers, and are disrupted when the male is separated from his mate and pups  
89 (Gubernick et al., 1995). These rodent studies in prairie voles and California mice suggest that  
90 social experience may drive important changes to the OXT system. These studies further  
91 enhance expectations for OXT to increase paternal behavior.

92       To mimic the natural pulses of OXT that may occur during these different social contexts  
93 and challenges, acute intranasal OXT (IN OXT) can be used. Previous studies in rodents have  
94 shown that IN OXT alters behavior within 5-min of administration (Bales et al., 2013) and can  
95 have behavioral effects that persist for 30-50 min after administration (Carter & Wilkinson,  
96 2015). Daily chronic doses of IN OXT induce long-term modifications to the OXT system (Bales

97 et al., 2013; Guoynes et al., 2018; Del Razo et al., 2020); however, single doses spread out across  
98 weeks are presumably less likely to have carry-over effects across tests (Huang et al., 2014).

99         The California mouse (*Peromyscus californicus*) is a strictly monogamous, biparental  
100 rodent species well-suited to examine how OXT modulates vocal production and social behavior  
101 across different life stages. California mice show aggression toward unfamiliar conspecifics (e.g.  
102 Rieger et al. 2018) including opposite-sex conspecifics (e.g. e.g.Pultorak et al., 2018). During  
103 pre-courtship aggression with an unfamiliar conspecific, there is a period of assessment and often  
104 aggression (Gleason & Marler, 2010) that we will refer to as the pre-courtship aggression phase.  
105 Most of this aggression is in the form of non-contact aggression such as chasing and lunging, but  
106 the aggression can escalate to contact forms of aggression such as wrestling. Based on previous  
107 experience pairing female and male California mice in the lab, most prospective pairs show some  
108 form of aggression (i.e. lunging, chasing) but fewer pairs show contact aggression (i.e. wrestling)  
109 (Gleason & Marler, 2010). Once paired, female and male California mice form strong, reliable  
110 pair bonds but will still show reliable aggression toward unfamiliar conspecifics (Bester-  
111 Meredith & Marler, 2001; Trainor & Marler, 2001; Bester-Meredith & Marler, 2007); such  
112 aggression is decreased by an antagonist (V1a) to vasopressin (Bester-Meredith et al. 2005), a  
113 similar neuropeptide that is often positively associated with aggression. The period of pre-  
114 courtship aggression in the California mice is significantly longer than in other monogamous  
115 animal models such as the prairie vole. While prairie voles mate within the first 41 hrs of being  
116 paired (Witt et al., 1988), California mice mate 7-14 days after being paired (Bester-Meredith et  
117 al., 2003; Trainor et al., 2001; Gleason & Marler 2010). This longer period of courtship may  
118 reflect a longer assessment period for potential mates, as expected in a monogamous species. The  
119 first litter of pups is typically born between six and eight weeks after the initial pre-courtship

120 aggression. Once pups are born, both fathers and mothers engage in parental care (Bester-  
121 Meredith & Marler, 2001; Bester-Meredith & Marler, 2003; Lee & Brown 2002; Trainor et al.,  
122 2003; Trainor & Marler, 2003; Marler et al., 2003; Lee et al., 2007; Frazier et al., 2006; Becker  
123 et al., 2010; Gleason & Marler, 2010; Bester-Meredith & Marler, 2012; Johnson et al., 2015;  
124 Rieger et al., 2019; Guoynes & Marler, 2021).

125 California mice also have a diverse, well-characterized repertoire of ultrasonic  
126 vocalizations (USVs) including simple sweeps, complex sweeps, syllable vocalizations, barks,  
127 and pup whines (Briggs et al. 2011; Kalcounis-Rueppell et al., 2006; Pultorak et al., 2015; Rieger  
128 & Marler, 2018; Guoynes & Marler, 2021). A previous study in mother-offspring interactions  
129 demonstrated that the primary call types observed were maternal simple sweeps and pup whines;  
130 maternal simple sweeps correlated with both maternal care and pup whines (Guoynes & Marler,  
131 2021). Similar to the prevalence of call types in mother-offspring interactions, preliminary  
132 recordings between fathers and pups indicated that the primary call types from fathers and pups  
133 were also paternal simple sweeps and pup whines, respectively. Moreover, OXT stimulated  
134 production of maternal sweeps (Guoynes & Marler 2021). Based on this, we predicted a similar  
135 response to OXT in fathers involving simple sweeps and pup whines. It is important to note that  
136 paternal simple sweeps and pup whines have also been recorded in other social contexts  
137 (Guoynes & Marler, 2021; Rieger et al., 2019; Pultorak et al., 2015; Pultorak et al., 2017).  
138 Because we were not manipulating the OXT system in the pups, we did not expect to see an  
139 effect of OXT on pup whine USVs.

140 In the current study, we aimed to address whether acute pulses of IN OXT alter an animal's  
141 response to social challenges. We hypothesized that 1) during the pre-courtship aggression  
142 phase, IN OXT would reduce aggression, specifically the escalation to contact aggression (i.e.,

143 wrestling) in male-female aggression and increase affiliative behavior, 2) during resident intruder  
144 paradigms IN OXT would increase aggression towards an intruding male and 3) during a  
145 parental care test, similar to the effects in mothers, IN OXT would have a positive effect on  
146 paternal care and paternal vocalizations.

## 147 **2. Methods and Materials**

148

### 149 **2.1. Animals**

150 University of Wisconsin-Madison Institutional Animal Care and Use Committee  
151 approved this research. We used 24 male *P. californicus* aged 5–10 months. They were group-  
152 housed (2–3 per cage; 48 × 27 × 16 cm) under a 14L: 10D light cycle with lights off at 4:00pm.  
153 Animals were maintained in accordance with the National Institute of Health Guide for the Care  
154 and Use of Laboratory Animals. Males were randomly assigned to either the saline control group  
155 (N=12) or the OXT group (N=12). The OXT group received three total doses of OXT and the  
156 saline group received three total doses of saline (one dose given 5-min before each behavioral  
157 test) over eight weeks. For pair bond initiation, 24 female mates unrelated by at least two  
158 generations were randomly assigned to the focal test males. For the resident intruder test, 24  
159 unrelated male intruders were randomly assigned to the focal test males. During the paternal care  
160 test, pup number across treatments was very similar such that the average number of pups for  
161 fathers in the saline control condition was  $2.13 \pm 0.23$  (mean  $\pm$  SE), and average number of pups  
162 for fathers in the OXT condition was  $2.25 \pm 0.16$  (**S. Table 3**).

163

### 164 **2.2. Intranasal Oxytocin Preparation**

165 Male mice were infused intranasally with either sterile saline or IN OXT (0.8  
166 IU/kg) (Bachem, Torrance, California) (Guynes & Marler, 2021). The IN OXT dose is



167 equivalent to doses used in other animal models (Bales et al. 2014; Guoynes et al. 2018;  
168 Murgatroyd et al. 2016) and similar to weight-adjusted doses used in clinical studies examining  
169 the effects of IN OXT on social deficits in autism (Bales et al., 2013). IN OXT was dissolved in  
170 saline and prepared in one batch that was aliquoted into small plastic tubes and frozen at 20°C.  
171 IN OXT was defrosted just prior to administration. A blunt cannula needle (33-gauge, 2.8 mm  
172 length; Plastics One, Roanoke, Virginia) was attached to cannula tubing, flushed, and filled with  
173 the compound, then attached to an airtight Hamilton syringe (Bachem, Torrance, California). The  
174 animal was scruffed and 25 uL of compound was expelled dropwise through the cannula needle  
175 and allowed to absorb into the nasal mucosa (~10-20 seconds). One person conducted all IN  
176 OXT administrations throughout the entire procedure to maintain consistency in handling and IN  
177 OXT infusion. We chose to use the method of intranasal administration of IN OXT for two  
178 primary reasons. (1) IN OXT is used in clinical studies and is less invasive, does not require  
179 special transporters for the molecule, and is presumed to be less stressful compared to  
180 intracerebroventricular (Talegaonkar & Mishra 2004). (2) IN OXT shows similar behavioral  
181 effects as centrally administered OXT, increases CSF and plasma concentrations of OXT, and  
182 reaches the relevant brain areas in both humans and animal models (Neumann et al., 2013;  
183 Striepens et al., 2013; Lee et al. 2018; Oppong-Damoah et al., 2019; Lee et al., 2020). Several  
184 studies have also shown changes in plasma OXT concentrations that peak between 15 to 30-min  
185 post-administration (Freeman et al., 2016; Gossen et al., 2012). These results suggest IN OXT  
186 passes through the blood-brain barrier to exert central effects. In California mice, behavioral  
187 effects of IN OXT are consistent with the outcomes of central OXT manipulations suggesting  
188 that IN OXT is reaching the brain (Duque-Wilckens et al. 2018, 2020). Other studies indicate  
189 that some of the effects of IN OXT are acting through peripheral mechanisms (Churchland &

190 Winkielman, 2012; Quintana et al., 2015; Leng & Ludwig, 2016). Regardless of whether IN  
191 OXT is directly targeting the brain, is acting through peripheral mechanisms, or a combination of  
192 both, IN OXT has been shown to rapidly alter social behavior in adult California mice (Steinman  
193 et al., 2016).

194

### 195 **2.3. Behavioral Tests**

196 Throughout the experiment, all researchers administering treatments and handling  
197 animals were blind to treatment condition. For each test, the same researcher administered all  
198 intranasal treatments to reduce variance across handling and administration.

#### 199 *Pre-courtship aggression test*

200 Male California mice aged 5-10 months were removed from their home cage  
201 (48 × 27 × 16 cm) and given 25 uL of 0.8 IU/kg OXT or saline. Immediately after treatment,  
202 each male was placed in a new home cage (48 × 27 × 16 cm) with fresh bedding. 5-min after the  
203 dose of OXT or saline, a novel, unrelated female was placed into the new home cage. Their  
204 interaction was videotaped for 10-min (**Fig. 1A**). After the recording, the male and female  
205 continued to be housed together for the remainder of the experiments.

#### 206 *Resident intruder test*

207 We continued to use the same male and female pairs as in the pre-courtship aggression  
208 test above, but 14 days after being paired. Residency in the home cage was established by  
209 housing the mice in the same home cage for 6 consecutive days. This is more than sufficient time  
210 to establish residency in males (Bester-Meredith et al., 1999; Marler et al., 2003; Fuxjager et al.,  
211 2010; Zhao et. al 2014). Immediately before testing, female pair mates were removed from the  
212 home cage and placed in a new home cage with fresh bedding adjacent to the old home cage with

213 soiled bedding (each  $48 \times 27 \times 16$  cm). Male pair mates were given 25 uL of 0.8 IU/kg OXT or  
214 saline (same treatment as they received in the pre-courtship aggression test) and placed back in  
215 their home cage with soiled bedding. 5-min after administration of OXT, an unrelated, novel  
216 male was placed on the far side of the resident's cage. Their interaction was recorded for 5-min  
217 (**Fig. 1A**). After the test, the novel male was removed and placed back in his home cage and then  
218 the resident male given OXT or saline was removed and placed into the clean home cage with  
219 his female pair mate.

#### 220 *Paternal care test with ultrasonic vocalizations (USVs)*

221 This test used the same male and female pairs as in the pre-courtship aggression test and  
222 resident intruder test (above) and was conducted three to six weeks after the resident-intruder  
223 test—on the first or second day after their first litter was born. Pairs were monitored and checked  
224 for pups daily. Testing occurred within 48 hrs of the pups being born during a stage of  
225 postpartum estrous. The pups were removed from the mother, and the mother was placed in a  
226 new home cage with some soiled bedding from the home cage. Next, the father and pups in their  
227 home cage were transferred from the mouse housing room to a behavior testing room capable of  
228 recording USVs. This procedure is similar to paradigms previously used in the lab (Guoynes &  
229 Marler, 2021; Pultorak et al., 2015; Rieger & Marler, 2018). Testing was done in a custom arena  
230 split into two equally sized chambers ( $45.0 \text{ cm} \times 30.0 \text{ cm} \times 30.0 \text{ cm}$ ) and contained two  
231 symmetrically located circular openings (3.8 cm in diameter, center of opening 7 cm from the  
232 side wall) covered by a wire mesh. Ultrasonic microphones (described below) were placed on  
233 each side of the divider. One side of the divider was designated to the focal male, the other to the  
234 pup(s). This setup allowed visual, auditory, and olfactory communication between pups and their  
235 father, but restricted physical contact between individuals until the mesh wire was removed. In

236 the testing room, fathers were given a third dose of either 25 uL of 0.8 IU/kg OXT or saline  
237 (same treatment as they received in the pre-courtship aggression test and aggression test) and  
238 placed back into their home cage for 5-min (**Fig. 1A**). At the end of the 5-min waiting period, the  
239 pups were moved into the side of the testing chamber near the door, and the fathers were moved  
240 into the chamber closest to the wall. They interacted through the mesh divider intact for the first  
241 3-min, then the divider was removed, and the fathers and pups could physically interact for an  
242 additional 5-min. Vocalizations and video were recorded for the entire 8-min period. These time  
243 periods were chosen because they minimized the time that the pups were away from their mother  
244 but allowed enough time to quantify behavioral differences in retrievals.

#### 245 **2.4. Behavior Quantification**

246 All behavior videos were scored twice: once each by two independent observers blind to  
247 treatment and in a random order. Scores between observers had to be at least 85% similar and  
248 scores between the two observers were averaged for the final output used in statistical analysis.  
249 For an ethogram describing these different behaviors

#### 250 **2.5. Ultrasonic Vocalization Analysis**

251 Techniques used for recording were similar to those previously used in our laboratory  
252 (Pultorak et al. 2017; Rieger & Marler 2018; Guynes & Marler 2021). USVs were collected  
253 using two Emkay/Knowles FG series microphones capable of detecting broadband sound (10–  
254 120 kHz). Microphones were placed at the far ends of each of the two chambers. Microphone  
255 channels were calibrated to equal gain (– 60 dB noise floor). We used RECORDER software  
256 (Avisoft Bioacoustics) to produce triggered WAV file recordings (each with a duration of 0.5 s)  
257 upon the onset of a sound event that surpassed a set threshold of 5% energy change (Kalcounis-  
258 Rueppell et al., 2010). Recordings were collected at a 250 kHz sampling rate with a 16-bit

259 resolution. Spectrograms were produced with a 512 FFT (Fast Fourier Transform) using Avisoft-  
260 SASLab Pro sound analysis software (Avisoft Bioacoustics). The only USVs found in these  
261 recordings were pup whines and paternal simple sweeps. Pup whines have a peak frequency  
262 around 20 kHz (Johnson et al., 2017; Kalcounis-Rueppell et al., 2018a) and the typical  
263 downward modulation at the end of the call often distinguishes these calls from adult syllable  
264 vocalizations (Guoynes & Marler, 2021; Nathaniel Rieger, Jose Hernandez, & Catherine Marler,  
265 unpublished) (**Figure 1B**). The lower frequencies in the pup whine can also be heard by human  
266 ears (below the ultrasonic range). Paternal simple sweeps were categorized by short downward-  
267 sweeping vocalizations that sweep through multiple frequencies, typically between 80 kHz and  
268 40 kHz (Kalcounis-Rueppell et al., 2018b) (**Figure 1B**). It is extremely rare for pups to produce  
269 simple sweep USVs during PND 0-4 (Rieger, N. S., Hernandez, J. B., and Marler, C. M.,  
270 unpublished). When young pups produce simple sweeps, they are produced much faster and  
271 present completely vertical on the spectrogram (Johnson et al., 2017). This makes these rare pup  
272 simple sweeps easy to distinguish from the slower adult simple sweep USVs (**Fig. 1B**). Because  
273 of their different spectrogram and acoustic properties, all USVs could be categorized and  
274 counted by combined visual and auditory inspections of the WAV files (sampling rate reduced to  
275 11,025 kHz, corresponding to 4% of real-time playback speed).

## 276 **2.6. Data Analysis**

277 For each behavioral test, nonparametric Mann-Whitney tests were conducted to compare  
278 the outcomes between saline control and OXT males. In the pre-courtship aggression test, one  
279 OXT mouse was dropped from the analysis because he escaped from the apparatus just prior to  
280 testing. Final group size analyzed for the pre-courtship aggression test was N=12 for control  
281 males and N=11 for OXT males. In the resident intruder test, final group size analyzed for the

282 pre-courtship aggression test was N=12 for controls and N=12 for OXT males. In the paternal  
283 care test, three pairs were removed from behavioral analyses due to accidental deleting of the  
284 behavior videos (1 control male, 2 OXT males), and 5 were not tested because of either  
285 infanticide or not producing pups within eight weeks of pairing. Final group size analyzed for the  
286 behavioral and USV components of the paternal care test was N= 8 for controls and N=8 for  
287 OXT.

288 Correlations between paternal care and USVs were conducted using the program R. To  
289 assess for mediation by IN OXT in the relationships between (a) paternal USVs and paternal  
290 behavior and (b) paternal behavior and pup USVs, a multivariate comparison was used. Factors  
291 included in the model were treatment condition and the interaction between treatment and  
292 paternal behavior (e.g.  $[Paternal\ behavior] \sim [Paternal\ USV] + [treatment]$ ).

293 Significance level was set at  $p < 0.05$  for all analyses and all tests were two-tailed. All  
294 reported p-values were corrected using Benjamini-Hochberg false discovery rate corrections to  
295 control for multiple comparisons when effect of an X variable was tested for a relationship with  
296 multiple Y variables. False discovery rate was set at five percent.

297 **Figure 1. Experimental design. (A)** Timeline of the three behavioral tests throughout  
298 the longitudinal study. **(B)** Representative pup whine and paternal simple sweep USVs.  
299 Pup whines have multiple harmonics, a peak frequency around 20 kHz, and downward  
300 modulation at the end of the call that distinguish these calls from adult syllable  
301 vocalizations. Paternal simple sweeps have short downward-sweeping vocalizations  
302 that sweep through multiple frequencies, typically between 80 kHz and 40 kHz.  
303

## 304 **3.0 Results**

### 305 **3.1. Pre-courtship aggression test**

306 To determine whether IN OXT influenced escalation to contact aggression during pre-  
307 courtship aggression, we assessed number of wrestling bouts in male mice given IN OXT versus

308 saline. We found that OXT decreased the proportion of wrestling bouts out of all aggressive  
309 behaviors between the male and female during the first 10-min of pre-courtship aggression  
310 ( $U=33$ ,  $z\text{-score}=2.00$ ,  $p<0.05$ ) (**Fig. 2A**). Lunging aggression levels made up a relatively small  
311 proportion of the aggressive behaviors in both control and OXT males; however, differences  
312 arose in proportion of wrestling aggression (highest in control males) and chasing aggression  
313 (highest in OXT males) (**Fig. 2B**). Levels of non-contact aggression were relatively similar  
314 across groups (lunging aggression: CTRL= $1.29 \pm 1.36$  and OXT= $0.45 \pm 0.37$ ; chasing aggression:  
315 CTRL= $10.76 \pm 3.73$  and OXT= $12.80 \pm 3.82$ ) (**S. Table 1**). The biggest difference between  
316 treatment groups was amount of time spent engaged in contact aggression (wrestling aggression:  
317 CTRL= $11.58 \pm 6.22$  and OXT= $0.77 \pm 0.50$ ) (**S. Table 1**). Thus, the difference in proportion of  
318 wrestling of aggression between CTRL and OXT is being driven by time spent wrestling vs. time  
319 spent chasing. Other behaviors we did not predict would be affected by IN OXT such as social  
320 investigation (body and anogenital sniffing) and activity (autogrooming, rearing) were measured  
321 but not statistically analyzed (**S. Table 1**).

322 **Figure 2. Pre-courtship aggression test.** Males given OXT had a significantly smaller  
323 proportion of wrestling than control males during the first 10 min of courtship. **(B)** Pie  
324 chart showing escalating aggressive behavior (from light: low escalation, to dark: high  
325 escalation). \* $p<0.05$  for differences between control and OXT.  
326

### 327 **3.2. Resident intruder aggression test**

328 To determine whether IN OXT influenced escalation to contact aggression during a  
329 resident intruder test, we assessed the number of wrestling bouts in males given IN OXT versus  
330 saline. Unlike the pre-courtship aggression test, we found that IN OXT did not significantly  
331 influence number of wrestling bouts between the males during a 5-min resident intruder test  
332 ( $U=63.50$ ,  $z\text{-score}=0.46$ ,  $p=0.637$ ) (**Fig. 3A**). Similar to the pre-courtship aggression test,

333 lunging aggression levels made up a relatively small proportion of the aggressive behaviors in  
334 both control and OXT males (**Fig. 3B**). Both chasing and wrestling aggression made up  
335 approximately equal proportions of aggressive behavior in the resident intruder aggression test  
336 (**Fig. 3B**). Levels of all types of aggression were relatively similar across groups (lunging  
337 aggression: CTRL=2.25± 1.00 and OXT=1.63± 0.71; chasing aggression: CTRL=13.63± 5.52  
338 and OXT=11.28± 5.86; wrestling aggression: CTRL=11.47± 4.52 and OXT=10.69± 4.63) (**S.**  
339 **Table 2**). Other behaviors we did not predict would be affected by IN OXT such as social  
340 investigation (body and anogenital sniffing) and activity (autogrooming, rearing) were measured  
341 but not statistically analyzed (**S. Table 2**).

342 **Figure 3. Resident intruder aggression test. (A)** OXT and control males showed no  
343 difference in proportion of wrestling during a 5-min resident intruder encounter. **(B)** Pie  
344 chart showing escalating aggressive behavior (from light to dark). \* $p < 0.05$  for  
345 differences between control and OXT.  
346

### 347 **3.3. Paternal care test with ultrasonic vocalizations (USVs)**

348 To determine whether IN OXT would influence behavior during a paternal care challenge  
349 we assessed latency to approach pups, pup huddling, and paternal simple sweep USVs in fathers  
350 given IN OXT versus saline. Fathers given IN OXT were significantly faster at approaching their  
351 pups after a brief separation ( $U=10.50$ ,  $z\text{-score}=2.21$ ,  $p < 0.05$ ) (**Fig. 4A**). Despite initial  
352 differences in paternal care response, there were no differences between IN OXT and control  
353 males in total time huddling ( $U=22.50$ ,  $z\text{-score}=-0.95$ ,  $p=0.34$ ) (**Fig. 4B**) or licking pups ( $U=20$ ,  
354  $z\text{-score}=-1.21$ ,  $p=0.22$ ) (**Fig. 4C**). There was one father in the control group that showed much  
355 more paternal care than other control fathers, however, this father was not a Grubb's outlier for  
356 paternal care measures. Even if this father is removed from the analysis, the difference between  
357 control and OXT is not significant for huddling ( $U=14.50$ ,  $z\text{-score}=1.50$ ,  $p=0.13$ ) (**Fig. 4B**) or



358 licking ( $U=12$ ,  $z\text{-score}=1.79$ ,  $p=0.07$ ) (**Fig. 4C**). Neither IN OXT or control fathers engaged in  
359 any retrieval behavior throughout the test, so this type of paternal care was not analyzed (**S.**  
360 **Table 3**). There were no differences in number of pups across treatments groups (CTRL= $2.13 \pm$   
361  $1.84$ ; OXT= $2.25 \pm 1.54$ ). Other behaviors related to activity (autogrooming, freezing,  
362 rearing) were measured but were not included in the statistical analyses because we did not have  
363 *a priori* predictions for these behaviors during the paternal care test (**S. Table 3**).

364 Next, we assessed whether IN OXT would influence paternal and/or pup USVs behavior  
365 during a paternal care challenge. We assessed number of paternal simple sweeps and number of  
366 pup whines produced and their correlations with the two types of paternal care observed,  
367 huddling and licking. Fathers given IN OXT did not produce more simple sweeps than controls  
368 ( $U=23.50$ ,  $z\text{-score}=-0.84$ ,  $p=0.40$ ) (**Fig. 4D**). There were also no differences in number of pup  
369 whines produced in offspring of IN OXT versus control fathers ( $U=24.50$ ,  $z\text{-score}=0.35$ ,  $p=0.72$ )  
370 (**Fig. 4E**).

371 Lastly, we examined the relationship between paternal care and paternal and pup USVs  
372 and any interactions with OXT treatment. Using a multivariate model controlling for the effects  
373 of treatment, we found no main effects of paternal simple sweeps on huddling ( $F_{2,16}=0.21$ ,  
374  $p=0.65$ ,  $\eta^2=0.016$ ) (**Fig. 4H**) or licking ( $F_{2,16}=0.01$ ,  $p=0.91$ ,  $\eta^2=0.00$ ) (**Fig. 4J**). Similarly, we  
375 found no main effects of pup whines on huddling ( $F_{2,16}=0.05$ ,  $p=0.81$ ,  $\eta^2=0.00$ ) (**Fig. 4I**) or  
376 licking ( $F_{2,16}=0.07$ ,  $p=0.80$ ,  $\eta^2=0.00$ ) (**Fig. 4K**).

377  
378 **Figure 4. Paternal care test.** OXT males had shorter latencies to approach their pups  
379 than control males (**A**). OXT males did not show significant differences in huddling (**B**)  
380 or licking (**C**) behavior. (**D**) Males given OXT did not make more simple sweeps than  
381 control males. Paternal simple sweeps did not correlate with (**E**) huddling or (**F**) licking.  
382 (**G**) Pups with OXT versus control fathers showed no differences in number of pup

383 whines produced. There were no correlations between pup whines and **(H)** huddling or  
384 **(I)** or licking. \* $p < 0.05$  for differences between control and OXT.  
385

#### 386 **4. Discussion**

387 Our study assessed the response of male California mice to different challenges that  
388 would naturally occur during their lifespan. During contexts in which the social stimuli had the  
389 potential to become part of the in-group, a male-female bonded pair, OXT administered to the  
390 male promoted prosocial approach through reduced aggression. In contrast, during the resident-  
391 intruder aggression test, the social stimuli did not have the potential to become part of the in-  
392 group in a strongly territorial species, and OXT did not promote prosocial approach. Finally, in  
393 the paternal behavior test, OXT increased paternal motivation to approach pups in this biparental  
394 species. We speculate that OXT may function to promote social approach only in contexts that  
395 are or are likely to be affiliative-prone.

396 In the monogamous and territorial California mice, when virgins encounter an unfamiliar  
397 individual of the opposite sex, there is both an aggressive response to an unfamiliar conspecific,  
398 and possibly novelty, and a potential for pair bond formation. During the initial 10-min of this  
399 interaction, only aggressive behavior was exhibited, with no signs of affiliative behavior  
400 characteristic of later stages of courtship (Gleason & Marler, 2010) or as they are bonding  
401 (Pultorak et al., 2017); also similar to the behavioral sequence seen in research with other species  
402 between male and females prairie voles (Williams et al., 1992; Carter et al., 1995; Cho et al.,  
403 1999; Willett et al., 2018; Harbert et al., 2020) and marmosets (Smith et al., 2009). Because we  
404 were testing the effect of IN OXT on this early phase of a female-male introduction, we  
405 predicted that IN OXT would reduce the escalation to contact aggression but also increase  
406 affiliative behavior as described in the introduction. We found similar levels of lunging and

407 chasing behavior in both OXT and control males, but control males engaged in more wrestling  
408 aggression, leading to a significantly higher proportion of control males that escalated their  
409 aggression to contact aggression. In this context, OXT may increase the rapid social assessment  
410 of and approach towards a potential mate, attenuating high levels of aggression. This change in  
411 behavior may decrease time to pair bonding and reduce the chance of injury because males are  
412 approaching females with less intense aggression. In the time frame of this test, we did not see a  
413 transition to affiliative behavior in either OXT or control males. Similar OXT-driven reductions  
414 of aggression in mating contexts have been observed in female Syrian hamsters (Harmon et al.,  
415 2002). However, this is the first study reporting anti-aggressive effects of OXT during  
416 intersexual interactions in males towards females. This anti-aggressive effect of OXT may have  
417 been revealed in California mice specifically because they are a highly aggressive species that  
418 also has a prolonged courtship phase prior to mating.

419 In contrast to opposite-sex social interactions, encounters with unfamiliar individuals of  
420 the same sex interactions do not have the same potential for affiliative behavior in a highly  
421 monogamous and territorial species. While we predicted that IN OXT would increase escalation  
422 to contact aggression in the resident-intruder paradigm, we found that there was no difference in  
423 aggression between control and IN OXT treated males. This is consistent with another study that  
424 found the same dose of IN OXT used in this study (0.8 IU/kg) did not influence numbers of bites  
425 or attack latency in a resident intruder aggression test in California mice (Steinman et al., 2016).  
426 It is possible that in a highly territorial and monogamous species there may be selection for a  
427 maximum aggressive response to an intruding male. Interestingly, intracerebroventricular  
428 injections of vasopressin increased did not increase aggression in a resident-intruder paradigm  
429 for male California mice, but a V1a antagonist decreased aggression, further supporting the idea

430 of a maximum level of aggression (Bester-Meredith et al., 2005). Previous studies in less  
431 territorial species have found that OXT increases aggression. In house mice, OXTR null mice  
432 expressed increased intrasexual aggression (Devries et al., 1997). A study in female rats that  
433 manipulated OXT in lateral septum demonstrates that OXT increases and vasopressin decreases  
434 aggression towards same-sex intruders (Oliveira et al., 2021). Studies in humans have also  
435 shown an association between increased aggression, competition, and OXT (DeWall et al., 2014;  
436 Ne'eman et al., 2016; De Dreu, 2012; Fischer-Shofty et al., 2013). However, studies in  
437 monogamous marmosets (Cavanaugh et al., 2018), monogamous titi monkeys (Witczak et al.,  
438 2018), female and male rats (De Jong et al., 2014; Calcagnoli et al., 2013; Calcagnoli et al.,  
439 2015a; Calcagnoli et al., 2015b), house mice primed for aggressive behavior due to social  
440 isolation (Tan et al., 2019), and house mice bred for callous traits (Zoratto et al., 2018) found that  
441 OXT was associated with reduced intrasexual competition and aggression. Together with our  
442 data, these findings suggest that OXT's effect on intrasexual aggression may depend heavily on  
443 the species, brain areas activated by OXT, and social context.

444 In our last test, we aimed to assess whether IN OXT had similar prosocial effects in  
445 fathers as it did in California mice mothers (Guoynes & Marler, 2021). We predicted a positive  
446 prosocial effect on both paternal behavior and vocalizations. We found that IN OXT decreased  
447 paternal latency to approach their pups but did not influence overall level of paternal care.  
448 Studies in Mandarin voles have also shown similar effects of OXT on latency to engage in  
449 paternal care (Yuan et al., 2019). Reduced latency to approach pups in IN OXT fathers suggests  
450 that IN OXT may increase paternal motivation for pup contact without altering the quality of  
451 paternal care. This is supported by studies that show activation of the OXT system can increase  
452 dopamine and reinforce rewarding behavior (Borland et al., 2018; Borland et al., 2019; Dolen et

453 al., 2013; Martins et al., 2021). However, it is also possible that the decreased latency to  
454 approach pups was driven by dampening anxiety during the challenge test. Several studies have  
455 also shown that OXT can reduce anxiety and facilitate prosocial approach (Steinman et al., 2019;  
456 Williams et al., 2020; Cohen & Shamay-Tsoory, 2018; Domes et al., 2019). Because we did not  
457 observe any overall differences in level of paternal care during the test, the effects of OXT on  
458 paternal care may be rapid and more likely to influence paternal responsiveness in California  
459 mice versus quality of paternal care seen in marmosets (Saito & Nakamura, 2011; Finkenwirth et  
460 al., 2016) and human fathers (Naber et al., 2010; Feldman et al., 2010; Gordon et al., 2017; Li et  
461 al., 2017; review by Guoynes & Marler, 2020). We again see species variation in the effect of  
462 OXT on paternal care, suggesting that differences across species and brain connectivity may  
463 have significant impacts on the how OXT will affect paternal care.

464         In contrast to the positive association between simple sweeps and maternal care, simple  
465 sweeps produced by fathers did not have any relationship with paternal care. This could be due  
466 to fathers producing a lower number of calls than mothers during the same testing time frame  
467 (mothers produced approximately 1.0 simple sweep/s compared to fathers that produced  
468 approximately 0.33 simple sweeps/s) (Guoynes & Marler, 2021). However, it is also possible  
469 that fathers are more stressed in the absence of their partner than mothers are and therefore  
470 vocalize less. This is supported by findings in several other species that show blunted  
471 vocalization in response to heightened stress (Lumley et al., 1999; Chabout et al., 2012; Simola &  
472 Granon, 2019; Riaz et al., 2015). Lastly, it is also possible that there are sex differences in the  
473 function of simple sweeps in California mice, and that mothers rely more heavily on this call  
474 than fathers. Previous research in the lab has shown that while both fathers and mothers show  
475 biparental care, there are differences in parental care expression between fathers and mothers.

476 For example, during a very similar paradigm, mothers showed retrieval behavior, unlike fathers  
477 in this test (Guoynes & Marler, 2021), and when both parents are together and given a resident  
478 intruder challenge in the presence of their pups, fathers were first to approach pups while  
479 mothers did significantly more retrieving behavior (Rieger et al., 2019). This suggests that  
480 fathers and mothers may divide parental care duties differently and may, therefore, vocalize and  
481 communicate differently.

482 Overall, the social challenges tested during these experiments show that IN OXT  
483 increases prosocial approach behavior in affiliative-prone contexts, but not during the context of  
484 direct threat or competition. These results align with the social salience hypothesis of OXT  
485 (Kemp & Guastella, 2010; Shamay-Tsoory & Abu-Akel, 2016; Peled-Avron & Shamay-Tsoory,  
486 2018). This hypothesis suggests OXT enhances the processing of social stimuli and that this can  
487 either lead to affiliative or aggressive behavior depending on the environment, social stimuli, and  
488 internal state of the animal. Across the lifespan in a monogamous, territorial species, it is critical  
489 to assess social contexts and balance the costs of aggression and challenges with the benefits of  
490 mating opportunities and offspring-rearing. To our knowledge, our study is the first to assess the  
491 effect of IN OXT during different life-stage challenges in the same animal. Furthermore, our  
492 study was the first to show an effect of OXT dampening aggression during pre-courtship female-  
493 male interactions.

494

#### 495 Acknowledgements

496 We would like to thank NSF grant IOS-1946613 for generously funding this research,  
497 undergraduate student support for their work during implementation of the experiment and  
498 quantification of behavior, UW Madison animal care staff for their excellent care of the animals,  
499 and the Serendipity Scholarship Award for summer funding.

500

501   References

- 502   Bales, K. L., & Carter, C. S. (2003). Sex differences and developmental effects of oxytocin on  
503   aggression and social behavior in prairie voles (*Microtus ochrogaster*). *Hormones and*  
504   *Behavior*, 44(3), 178-184.  
505  
506   Bales, K.L., Perkeybile, A.M., Conley, O.G., Lee, M.H., Guoynes, C.D., Downing, G.M., Yun,  
507   C.R., Solomon, M., Jacob, S. and Mendoza, S.P. (2013). Chronic intranasal oxytocin causes  
508   long-term impairments in partner preference formation in male prairie voles. *Biological*  
509   *Psychiatry*, 74(3), 180-188.  
510  
511   Bales, K.L., Solomon, M., Jacob, S., Crawley, J.N., Silverman, J.L., Larke, R.H., Sahagun, E.,  
512   Puhger, K.R., Pride, M.C. and Mendoza, S.P. (2014). Long-term exposure to intranasal oxytocin  
513   in a mouse autism model. *Translational Psychiatry*, 4(11), e480-e480.  
514  
515   Becker, E. A., Moore, B. M., Auger, C., & Marler, C. A. (2010). Paternal behavior increases  
516   testosterone levels in offspring of the California mouse. *Hormones and Behavior*, 58(3), 385-  
517   389.  
518  
519   Bester-Meredith, J. K., & Marler, C. A. (2001). Vasopressin and aggression in cross-fostered  
520   California mice (*Peromyscus californicus*) and white-footed mice (*Peromyscus*  
521   *leucopus*). *Hormones and Behavior*, 40(1), 51-64.  
522  
523   Bester-Meredith, J. K., & Marler, C. A. (2003). The association between male offspring  
524   aggression and paternal and maternal behavior of *Peromyscus* mice. *Ethology*, 109(10), 797-808.  
525  
526   Bester-Meredith, J. K., & Marler, C. A. (2012). Naturally occurring variation in vasopressin  
527   immunoreactivity is associated with maternal behavior in female *Peromyscus* mice. *Brain,*  
528   *Behavior and Evolution*, 80(4), 244-253.  
529  
530   Bester-Meredith, J. K., & Marler, C. A. (2007). Social experience during development and  
531   female offspring aggression in *Peromyscus* mice. *Ethology*, 113(9), 889-900.  
532  
533   Bester-Meredith, J. K., Martin, P. A., & Marler, C. A. (2005). Manipulations of vasopressin alter  
534   aggression differently across testing conditions in monogamous and non-monogamous  
535   *Peromyscus* mice. *Aggressive Behavior*, 31(2), 189-199.  
536  
537   Bester-Meredith, J. K., Young, L. J., & Marler, C. A. (1999). Species differences in paternal  
538   behavior and aggression in *Peromyscus* and their associations with vasopressin immunoreactivity  
539   and receptors. *Hormones and Behavior*, 36(1), 25-38.  
540  
541   Bethlehem, R. A., Baron-Cohen, S., van Honk, J., Auyeung, B., & Bos, P. A. (2015). The  
542   oxytocin paradox. *Oxytocin's routes in social behavior: into the 21st century. "Precision*  
543   *Medicine" approach for Oxytocin*, 116.  
544



- 545 Blocker, T. D., & Ophir, A. G. (2015). Social recognition in paired, but not single, male prairie  
546 voles. *Animal Behaviour*, *108*, 1-8.  
547
- 548 Borland, J. M., Grantham, K. N., Aiani, L. M., Frantz, K. J., & Albers, H. E. (2018). Role of  
549 oxytocin in the ventral tegmental area in social reinforcement. *Psychoneuroendocrinology*, *95*,  
550 128-137.  
551
- 552 Borland, J. M., Rilling, J. K., Frantz, K. J., & Albers, H. E. (2019). Sex-dependent regulation of  
553 social reward by oxytocin: an inverted U hypothesis. *Neuropsychopharmacology*, *44*(1), 97-110.  
554
- 555 Bosch, O. J., & Neumann, I. D. (2012). Both oxytocin and vasopressin are mediators of maternal  
556 care and aggression in rodents: from central release to sites of action. *Hormones and*  
557 *Behavior*, *61*(3), 293-303.  
558
- 559 Bosch, O. J., & Young, L. J. (2017). Oxytocin and social relationships: from attachment to bond  
560 disruption. *Behavioral Pharmacology of Neuropeptides: Oxytocin*, 97-117.  
561
- 562 Briggs, J. R., & Kalcounis-Rueppell, M. C. (2011). Similar acoustic structure and behavioural  
563 context of vocalizations produced by male and female California mice in the wild. *Animal*  
564 *Behaviour*, *82*(6), 1263-1273.  
565
- 566 Calcagnoli, F., de Boer, S. F., Althaus, M., Den Boer, J. A., & Koolhaas, J. M. (2013).  
567 Antiaggressive activity of central oxytocin in male rats. *Psychopharmacology*, *229*(4), 639-651.  
568
- 569 Calcagnoli, F., Stubbendorff, C., Meyer, N., de Boer, S. F., Althaus, M., & Koolhaas, J. M.  
570 (2015). Oxytocin microinjected into the central amygdaloid nuclei exerts anti-aggressive effects  
571 in male rats. *Neuropharmacology*, *90*, 74-81.  
572
- 573 Calcagnoli, F., Kreuzmann, J. C., de Boer, S. F., Althaus, M., & Koolhaas, J. M. (2015). Acute  
574 and repeated intranasal oxytocin administration exerts anti-aggressive and pro-affiliative effects  
575 in male rats. *Psychoneuroendocrinology*, *51*, 112-121.  
576
- 577 Carter, C. S., Devries, A. C., & Getz, L. L. (1995). Physiological substrates of mammalian  
578 monogamy: the prairie vole model. *Neuroscience & Biobehavioral Reviews*, *19*(2), 303-314.  
579
- 580 Carter, G. G., & Wilkinson, G. S. (2015). Intranasal oxytocin increases social grooming and food  
581 sharing in the common vampire bat *Desmodus rotundus*. *Hormones and Behavior*, *75*, 150-153.  
582
- 583 Cavanaugh, J., Mustoe, A., Womack, S. L., & French, J. A. (2018). Oxytocin modulates mate-  
584 guarding behavior in marmoset monkeys. *Hormones and Behavior*, *106*, 150-161.  
585
- 586 Chabout, J., Serreau, P., Ey, E., Bellier, L., Aubin, T., Bourgeron, T., & Granon, S. (2012). Adult  
587 male mice emit context-specific ultrasonic vocalizations that are modulated by prior isolation or  
588 group rearing environment. *PLoS One*, *7*(1), e29401.  
589



- 590 Cho, M. M., DeVries, A. C., Williams, J. R., & Carter, C. S. (1999). The effects of oxytocin and  
591 vasopressin on partner preferences in male and female prairie voles (*Microtus*  
592 *ochrogaster*). *Behavioral Neuroscience*, *113*(5), 1071.
- 593  
594 Churchland, P. S., & Winkielman, P. (2012). Modulating social behavior with oxytocin: how  
595 does it work? What does it mean? *Hormones and Behavior*, *61*(3), 392-399.
- 596  
597 Cohen, D., & Shamay-Tsoory, S. G. (2018). Oxytocin regulates social approach. *Social*  
598 *Neuroscience*, *13*(6), 680-687.
- 599  
600 De Dreu, C. K. (2012). Oxytocin modulates cooperation within and competition between groups:  
601 an integrative review and research agenda. *Hormones and Behavior*, *61*(3), 419-428.
- 602  
603 De Dreu, C.K., Greer, L.L., Handgraaf, M.J., Shalvi, S., Van Kleef, G.A., Baas, M., Ten Velden,  
604 F.S., Van Dijk, E. and Feith, S.W., 2010. The neuropeptide oxytocin regulates parochial altruism  
605 in intergroup conflict among humans. *Science*, *328*(5984), pp.1408-1411.
- 606  
607 De Dreu, C. K., Gross, J., Méder, Z., Giffin, M., Prochazkova, E., Krikeb, J., & Columbus, S.  
608 (2016). In-group defense, out-group aggression, and coordination failures in intergroup  
609 conflict. *Proceedings of the National Academy of Sciences*, 201605115.
- 610  
611 De Jong, T. R., Beiderbeck, D. I., & Neumann, I. D. (2014). Measuring virgin female aggression  
612 in the female intruder test (FIT): effects of oxytocin, estrous cycle, and anxiety. *PLoS One*, *9*(3),  
613 e91701.
- 614  
615 Del Razo, R.A., Berger, T., Conley, A.J., Freeman, S.M., Goetze, L.R., Jacob, S., Lawrence,  
616 R.H., Mendoza, S.P., Rothwell, E.S., Savidge, L.E. and Solomon, M. (2020). Effects of chronic  
617 intranasal oxytocin on behavior and cerebral glucose uptake in juvenile titi  
618 monkeys. *Psychoneuroendocrinology*, *113*, 04494.
- 619  
620 DeVries, A. C., Young III, W. S., & Nelson, R. J. (1997). Reduced aggressive behaviour in mice  
621 with targeted disruption of the oxytocin gene. *Journal of Neuroendocrinology*, *9*(5), 363-368.
- 622  
623 DeWall, C. N., Gillath, O., Pressman, S. D., Black, L. L., Bartz, J. A., Moskowitz, J., & Stetler,  
624 D. A. (2014). When the love hormone leads to violence: oxytocin increases intimate partner  
625 violence inclinations among high trait aggressive people. *Social Psychological and Personality*  
626 *Science*, *5*(6), 691-697.
- 627  
628 Dölen, G., Darvishzadeh, A., Huang, K. W., & Malenka, R. C. (2013). Social reward requires  
629 coordinated activity of nucleus accumbens oxytocin and serotonin. *Nature*, *501*(7466), 179-184.
- 630  
631 Domes, G., Ower, N., von Dawans, B., Spengler, F.B., Dziobek, I., Bohus, M., Matthies, S.,  
632 Philipsen, A. & Heinrichs, M. (2019). Effects of intranasal oxytocin administration on empathy  
633 and approach motivation in women with borderline personality disorder: a randomized  
634 controlled trial. *Translational Psychiatry*, *9*(1), pp.1-9.

- 635  
636 Duque-Wilckens, N., Steinman, M.Q., Busnelli, M., Chini, B., Yokoyama, S., Pham, M., Laredo,  
637 S.A., Hao, R., Perkeybile, A.M., Minie, V.A. & Tan, P.B. (2018). Oxytocin receptors in the  
638 anteromedial bed nucleus of the stria terminalis promote stress-induced social avoidance in  
639 female California mice. *Biological Psychiatry*, 83(3), pp.203-213.  
640  
641 Duque-Wilckens, N., Torres, L.Y., Yokoyama, S., Minie, V.A., Tran, A.M., Petkova, S.P., Hao,  
642 R., Ramos-Maciel, S., Rios, R.A., Jackson, K. and Flores-Ramirez, F.J. (2020).  
643 Extrahypothalamic oxytocin neurons drive stress-induced social vigilance and  
644 avoidance. *Proceedings of the National Academy of Sciences*, 117(42), pp.26406-26413.  
645  
646 Egito, J. H., Nevat, M., Shamay-Tsoory, S. G., & Osório, A. A. C. (2020). Oxytocin increases  
647 the social salience of the outgroup in potential threat contexts. *Hormones and Behavior*, 122,  
648 104733.  
649  
650 Feldman, R., Gordon, I., Schneiderman, I., Weisman, O., & Zagoory-Sharon, O. (2010). Natural  
651 variations in maternal and paternal care are associated with systematic changes in oxytocin  
652 following parent–infant contact. *Psychoneuroendocrinology*, 35(8), 1133-1141.  
653  
654 Finkenwirth, C., Martins, E., Deschner, T., & Burkart, J. M. (2016). Oxytocin is associated with  
655 infant-care behavior and motivation in cooperatively breeding marmoset monkeys. *Hormones  
656 and Behavior*, 80, 10-18.  
657  
658 Fischer-Shofty, M., Levkovitz, Y., & Shamay-Tsoory, S. G. (2013). Oxytocin facilitates accurate  
659 perception of competition in men and kinship in women. *Social Cognitive and Affective  
660 Neuroscience*, 8(3), 313-317.  
661  
662 Frazier, C. R., Trainor, B. C., Cravens, C. J., Whitney, T. K., & Marler, C. A. (2006). Paternal  
663 behavior influences development of aggression and vasopressin expression in male California  
664 mouse offspring. *Hormones and Behavior*, 50(5), 699-707.  
665  
666 Freeman, S. M., Samineni, S., Allen, P. C., Stockinger, D., Bales, K. L., Hwa, G. G., & Roberts,  
667 J. A. (2016). Plasma and CSF oxytocin levels after intranasal and intravenous oxytocin in awake  
668 macaques. *Psychoneuroendocrinology*, 66, 185-194.  
669  
670 Fuxjager, M. J., Montgomery, J. L., Becker, E. A., & Marler, C. A. (2010). Deciding to win:  
671 interactive effects of residency, resources and ‘boldness’ on contest outcome in white-footed  
672 mice. *Animal Behaviour*, 80(5), 921-927.  
673  
674 Gleason, E. D., & Marler, C. A. (2010). Testosterone response to courtship predicts future  
675 paternal behavior in the California mouse, *Peromyscus californicus*. *Hormones and  
676 Behavior*, 57(2), 147-154.  
677  
678 Gordon, I., Pratt, M., Bergunde, K., Zagoory-Sharon, O., & Feldman, R. (2017). Testosterone,  
679 oxytocin, and the development of human parental care. *Hormones and Behavior*, 93, 184-192.

680  
681 Gossen, A., Hahn, A., Westphal, L., Prinz, S., Schultz, R. T., Gründer, G., & Spreckelmeyer, K.  
682 N. (2012). Oxytocin plasma concentrations after single intranasal oxytocin administration—a  
683 study in healthy men. *Neuropeptides*, *46*(5), 211-215.  
684  
685 Guastella, A. J., Mitchell, P. B., & Dadds, M. R. (2008). Oxytocin increases gaze to the eye  
686 region of human faces. *Biological Psychiatry*, *63*(1), 3-5.  
687  
688 Gubernick, D. J., Winslow, J. T., Jensen, P., Jeanotte, L., & Bowen, J. (1995). Oxytocin changes  
689 in males over the reproductive cycle in the monogamous, biparental California mouse,  
690 *Peromyscus californicus*. *Hormones and Behavior*, *29*(1), 59-73.  
691  
692 Guoynes, C., & Marler, C. (2020). Paternal Behavior from a Neuroendocrine Perspective.  
693 In *Oxford Research Encyclopedia of Neuroscience*. Retrieved 18 Jun. 2021, from  
694 [https://oxfordre.com/neuroscience/view/10.1093/acrefore/9780190264086.001.0001/acrefore-](https://oxfordre.com/neuroscience/view/10.1093/acrefore/9780190264086.001.0001/acrefore-9780190264086-e-9)  
695 [9780190264086-e-9](https://oxfordre.com/neuroscience/view/10.1093/acrefore/9780190264086.001.0001/acrefore-9780190264086-e-9).  
696  
697 Guoynes, C. D., & Marler, C. A. (2021). An acute dose of intranasal oxytocin rapidly increases  
698 maternal communication and maintains maternal care in primiparous postpartum California  
699 mice. *PloS One*, *16*(4), e0244033.  
700  
701 Guoynes, C. D., Simmons, T. C., Downing, G. M., Jacob, S., Solomon, M., & Bales, K. L.  
702 (2018). Chronic intranasal oxytocin has dose-dependent effects on central oxytocin and  
703 vasopressin systems in prairie voles (*Microtus ochrogaster*). *Neuroscience*, *369*, 292-302.  
704  
705 Harbert, K. J., Pellegrini, M., Gordon, K. M., & Donaldson, Z. R. (2020). How prior pair-  
706 bonding experience affects future bonding behavior in monogamous prairie voles. *Hormones and*  
707 *Behavior*, *126*, 104847.  
708  
709 Harmon, A. C., Huhman, K. L., Moore, T. O., & Albers, H. E. (2002). Oxytocin inhibits  
710 aggression in female Syrian hamsters. *Journal of Neuroendocrinology*, *14*(12), 963-969.  
711  
712 Hernádi, A., Kis, A., Kanizsár, O., Tóth, K., Miklósi, B., & Topál, J. (2015). Intranasally  
713 administered oxytocin affects how dogs (*Canis familiaris*) react to the threatening approach of  
714 their owner and an unfamiliar experimenter. *Behavioural Processes*, *119*, 1-5.  
715  
716 Holley, A., Bellevue, S., Vosberg, D., Wenzel, K., Roorda Jr, S., & Pfaus, J. G. (2015). The role  
717 of oxytocin and vasopressin in conditioned mate guarding behavior in the female rat. *Physiology*  
718 *and Behavior*, *144*, 7-14.  
719  
720 Huang, H., Michetti, C., Busnelli, M., Manago, F., Sannino, S., Scheggia, D., Giancardo, L.,  
721 Sona, D., Murino, V., Chini, B. and Scattoni, M.L., 2014. Chronic and acute intranasal oxytocin  
722 produce divergent social effects in mice. *Neuropsychopharmacology*, *39*(5), pp.1102-1114.  
723

- 724 Johnson, S. A., Javurek, A. B., Painter, M. S., Peritore, M. P., Ellersieck, M. R., Roberts, R. M.,  
725 & Rosenfeld, C. S. (2015). Disruption of parenting behaviors in California mice, a monogamous  
726 rodent species, by endocrine disrupting chemicals. *PLoS One*, *10*(6), e0126284.  
727
- 728 Johnson, Z. V., Walum, H., Xiao, Y., Riefkohl, P. C., & Young, L. J. (2017). Oxytocin receptors  
729 modulate a social salience neural network in male prairie voles. *Hormones and Behavior*, *87*, 16-  
730 24.  
731
- 732 Kalcounis-Rueppell, M. C., Metheny, J. D., & Vonhof, M. J. (2006). Production of ultrasonic  
733 vocalizations by *Peromyscus* mice in the wild. *Frontiers in Zoology*, *3*(1), 1-12.  
734
- 735 Kalcounis-Rueppell, M.C., Petric, R., Briggs, J.R., Carney, C., Marshall, M.M., Willse, J.T.,  
736 Rueppell, O., Ribble, D.O. and Crossland, J.P. (2010). Differences in ultrasonic vocalizations  
737 between wild and laboratory California mice (*Peromyscus californicus*). *PLoS One*, *5*(4),  
738 p.e9705.  
739
- 740 Kalcounis-Rueppell, M. C., Petric, R., & Marler, C. A. (2018). The bold, silent type: predictors  
741 of ultrasonic vocalizations in the genus *Peromyscus*. *Frontiers in Ecology and Evolution*, *6*, 198.  
742
- 743 Kalcounis-Rueppell, M. C., Pultorak, J. D., & Marler, C. A. (2018). Ultrasonic vocalizations of  
744 mice in the genus *Peromyscus*. In *Handbook of Behavioral Neuroscience* (Vol. 25, pp. 227-235).  
745 Elsevier.  
746
- 747 Kosfeld, M., Heinrichs, M., Zak, P. J., Fischbacher, U., & Fehr, E. (2005). Oxytocin increases  
748 trust in humans. *Nature*, *435*(7042), 673-676.  
749
- 750 Lee, A. W., & Brown, R. E. (2002). Medial preoptic lesions disrupt parental behavior in both  
751 male and female California mice (*Peromyscus californicus*). *Behavioral Neuroscience*, *116*(6),  
752 968.  
753
- 754 Lee, A. W., & Brown, R. E. (2007). Comparison of medial preoptic, amygdala, and nucleus  
755 accumbens lesions on parental behavior in California mice (*Peromyscus*  
756 *californicus*). *Physiology and Behavior*, *92*(4), 617-628.  
757
- 758 Lee, M.R., Scheidweiler, K.B., Diao, X.X., Akhlaghi, F., Cummins, A., Huestis, M.A., Leggio,  
759 L. & Averbeck, B.B. (2018). Oxytocin by intranasal and intravenous routes reaches the  
760 cerebrospinal fluid in rhesus macaques: determination using a novel oxytocin assay. *Molecular*  
761 *Psychiatry*, *23*(1), 115.  
762
- 763 Lee, M.R., Shnitko, T.A., Blue, S.W., Kaucher, A.V., Winchell, A.J., Erikson, D.W., Grant, K.A.  
764 and Leggio, L., 2020. Labeled oxytocin administered via the intranasal route reaches the brain in  
765 rhesus macaques. *Nature Communications*, *11*(1), pp.1-10.  
766
- 767 Leng, G., & Ludwig, M. (2016). Intranasal oxytocin: myths and delusions. *Biological*  
768 *Psychiatry*, *79*(3), 243-250.

- 769  
770 Lumley, L. A., Sipos, M. L., Charles, R. C., Charles, R. F., & Meyerhoff, J. L. (1999). Social  
771 stress effects on territorial marking and ultrasonic vocalizations in mice. *Physiology &*  
772 *Behavior*, 67(5), 769-775.  
773
- 774 Marler, C. A., Bester-Meredith, J. K., & Trainor, B. C. (2003). Paternal behavior and aggression:  
775 Endocrine mechanisms and nongenomic transmission of behavior. In *Advances in the Study of*  
776 *Behavior* (ed. P.J.B. Slater, J.S. Rosenblatt, Snowdon, C.T. & Roper, T.J. New York: Academic  
777 Press.  
778
- 779 Martins, D., Lockwood, P., Cutler, J., Moran, R. J., & Paloyelis, Y. (2021). Oxytocin modulates  
780 neurocomputational mechanisms underlying prosocial reinforcement learning. *bioRxiv*.  
781
- 782 Murgatroyd, C.A., Hicks-Nelson, A., Fink, A., Beamer, G., Gurel, K., Elnady, F., Pittet, F. and  
783 Nephew, B.C., 2016. Effects of chronic social stress and maternal intranasal oxytocin and  
784 vasopressin on offspring interferon- $\gamma$  and behavior. *Frontiers in Endocrinology*, 7, p.155.  
785
- 786 Naber, F., van IJzendoorn, M. H., Deschamps, P., van Engeland, H., & Bakermans-Kranenburg,  
787 M. J. (2010). Intranasal oxytocin increases fathers' observed responsiveness during play with  
788 their children: a double-blind within-subject experiment. *Psychoneuroendocrinology*, 35(10),  
789 1583-1586.  
790
- 791 Ne'eman, R., Perach-Barzilay, N., Fischer-Shofty, M., Atias, A., & Shamay-Tsoory, S. G.  
792 (2016). Intranasal administration of oxytocin increases human aggressive behavior. *Hormones*  
793 *and Behavior*, 80, 125-131.  
794
- 795 Neumann, I. D., Maloumy, R., Beiderbeck, D. I., Lukas, M., & Landgraf, R. (2013). Increased  
796 brain and plasma oxytocin after nasal and peripheral administration in rats and  
797 mice. *Psychoneuroendocrinology*, 38(10), 1985-1993.  
798
- 799 Oppong-Damoah, A., Zaman, R. U., D'Souza, M. J., & Murnane, K. S. (2019). Nanoparticle  
800 encapsulation increases the brain penetrance and duration of action of intranasal  
801 oxytocin. *Hormones and Behavior*, 108, 20-29.  
802
- 803 Parr, L. A., Mitchell, T., & Hecht, E. (2018). Intranasal oxytocin in rhesus monkeys alters brain  
804 networks that detect social salience and reward. *American Journal of Primatology*, 80(10),  
805 e22915.  
806
- 807 Pultorak, J. D., Fuxjager, M. J., Kalcounis-Rueppell, M. C., & Marler, C. A. (2015). Male  
808 fidelity expressed through rapid testosterone suppression of ultrasonic vocalizations to novel  
809 females in the monogamous California mouse. *Hormones and Behavior*, 70, 47-56.  
810
- 811 Pultorak, J. D., Matusinec, K. R., Miller, Z. K., & Marler, C. A. (2017). Ultrasonic vocalization  
812 production and playback predicts intrapair and extrapair social behaviour in a monogamous  
813 mouse. *Animal Behaviour*, 125, 13-23.



814  
815 Quintana, D. S., Alvares, G. A., Hickie, I. B., & Guastella, A. J. (2015). Do delivery routes of  
816 intranasally administered oxytocin account for observed effects on social cognition and  
817 behavior? A two-level model. *Neuroscience & Biobehavioral Reviews*, *49*, 182-192.  
818  
819 Riaz, M. S., Bohlen, M. O., Gunter, B. W., Henry, Q., Stockmeier, C. A., & Paul, I. A. (2015).  
820 Attenuation of social interaction-associated ultrasonic vocalizations and spatial working memory  
821 performance in rats exposed to chronic unpredictable stress. *Physiology and Behavior*, *152*, 128-  
822 134.  
823  
824 Rieger, N. S., & Marler, C. A. (2018). The function of ultrasonic vocalizations during territorial  
825 defence by pair-bonded male and female California mice. *Animal Behaviour*, *135*, 97-108.  
826  
827 Rieger, N. S., Stanton, E. H., & Marler, C. A. (2019). Division of labour in territorial defence  
828 and pup retrieval by pair-bonded California mice, *Peromyscus californicus*. *Animal*  
829 *Behaviour*, *156*, 67-78.  
830  
831 Ring, R.H., Malberg, J.E., Potestio, L., Ping, J., Boikess, S., Luo, B., Schechter, L.E., Rizzo, S.,  
832 Rahman, Z. and Rosenzweig-Lipson, S., 2006. Anxiolytic-like activity of oxytocin in male mice:  
833 behavioral and autonomic evidence, therapeutic implications. *Psychopharmacology*, *185*(2),  
834 pp.218-225.  
835  
836 Saito, A., & Nakamura, K. (2011). Oxytocin changes primate paternal tolerance to offspring in  
837 food transfer. *Journal of Comparative Physiology A*, *197*(4), 329-337.  
838  
839 Shamay-Tsoory, S. G., & Abu-Akel, A. (2016). The social salience hypothesis of  
840 oxytocin. *Biological Psychiatry*, *79*(3), 194-202.  
841  
842 Shamay-Tsoory, S. G., Fischer, M., Dvash, J., Harari, H., Perach-Bloom, N., & Levkovitz, Y.  
843 (2009). Intranasal administration of oxytocin increases envy and schadenfreude  
844 (gloating). *Biological Psychiatry*, *66*(9), 864-870.  
845  
846 Simola, N., & Granon, S. (2019). Ultrasonic vocalizations as a tool in studying emotional states  
847 in rodent models of social behavior and brain disease. *Neuropharmacology*, *159*, 107420.  
848  
849 Smith, A. S., Ågmo, A., Birnie, A. K., & French, J. A. (2010). Manipulation of the oxytocin  
850 system alters social behavior and attraction in pair-bonding primates, *Callithrix*  
851 *penicillata*. *Hormones and Behavior*, *57*(2), 255-262.  
852  
853 Steinman, M.Q., Duque-Wilckens, N., Greenberg, G.D., Hao, R., Campi, K.L., Laredo, S.A.,  
854 Laman-Maharg, A., Manning, C.E., Doig, I.E., Lopez, E.M. and Walch, K. (2016). Sex-specific  
855 effects of stress on oxytocin neurons correspond with responses to intranasal  
856 oxytocin. *Biological Psychiatry*, *80*(5), pp.406-414.  
857

- 858 Steinman, M. Q., Duque-Wilckens, N., & Trainor, B. C. (2019). Complementary neural circuits  
859 for divergent effects of oxytocin: social approach versus social anxiety. *Biological*  
860 *Psychiatry*, 85(10), 792-801.
- 861  
862 Striepens, N., Kendrick, K. M., Hanking, V., Landgraf, R., Wüllner, U., Maier, W., &  
863 Hurlmann, R. (2013). Elevated cerebrospinal fluid and blood concentrations of oxytocin  
864 following its intranasal administration in humans. *Scientific Reports*, 3, 3440.
- 865  
866 Talegaonkar, S., & Mishra, P. R. (2004). Intranasal delivery: An approach to bypass the blood  
867 brain barrier. *Indian Journal of Pharmacology*, 36(3), 140.
- 868  
869 Tan, O., Musullulu, H., Raymond, J. S., Wilson, B., Langguth, M., & Bowen, M. T. (2019).  
870 Oxytocin and vasopressin inhibit hyper-aggressive behaviour in socially isolated  
871 mice. *Neuropharmacology*, 156, 107573.
- 872  
873 Theodoridou, A., Rowe, A. C., Penton-Voak, I. S., & Rogers, P. J. (2009). Oxytocin and social  
874 perception: oxytocin increases perceived facial trustworthiness and attractiveness. *Hormones and*  
875 *Behavior*, 56(1), 128-132.
- 876  
877 Trainor, B. C., Bird, I. M., Alday, N. A., Schlinger, B. A., & Marler, C. A. (2003). Variation in  
878 aromatase activity in the medial preoptic area and plasma progesterone is associated with the  
879 onset of paternal behavior. *Neuroendocrinology*, 78(1), 36-44.
- 880  
881 Trainor, B. C., & Marler, C. A. (2002). Testosterone promotes paternal behaviour in a  
882 monogamous mammal via conversion to oestrogen. *Proceedings of the Royal Society of London.*  
883 *Series B: Biological Sciences*, 269(1493), 823-829.
- 884  
885 Trainor, B. C., & Marler, C. A. (2001). Testosterone, paternal behavior, and aggression in the  
886 monogamous California mouse (*Peromyscus californicus*). *Hormones and Behavior*, 40(1), 32-  
887 42.
- 888  
889 Willett, J. A., Johnson, A. G., Vogel, A. R., Patisaul, H. B., McGraw, L. A., & Meitzen, J.  
890 (2018). Nucleus accumbens core medium spiny neuron electrophysiological properties and  
891 partner preference behavior in the adult male prairie vole, *Microtus ochrogaster*. *Journal of*  
892 *Neurophysiology*, 119(4), 1576-1588.
- 893  
894 Williams, A.V., Duque-Wilckens, N., Ramos-Maciél, S., Campi, K.L., Bhela, S.K., Xu, C.K.,  
895 Jackson, K., Chini, B., Pesavento, P.A. and Trainor, B.C., 2020. Social approach and social  
896 vigilance are differentially regulated by oxytocin receptors in the nucleus  
897 accumbens. *Neuropsychopharmacology*, 45(9), pp.1423-1430.
- 898  
899 Williams, J. R., Catania, K. C., & Carter, C. S. (1992). Development of partner preferences in  
900 female prairie voles (*Microtus ochrogaster*): the role of social and sexual experience. *Hormones*  
901 *and Behavior*, 26(3), 339-349.
- 902

- 903 Williams, J. R., Insel, T. R., Harbaugh, C. R., & Carter, C. S. (1994). Oxytocin administered  
904 centrally facilitates formation of a partner preference in female prairie voles (*Microtus*  
905 *ochrogaster*). *Journal of Neuroendocrinology*, 6(3), 247-250.
- 906
- 907 Winslow, J. T., Shapiro, L., Carter, C. S., & Insel, T. R. (1993). Oxytocin and complex social  
908 behavior: species comparisons. *Psychopharmacology Bulletin*.
- 909
- 910 Witzak, L. R., Ferrer, E., & Bales, K. L. (2018). Effects of aggressive temperament on  
911 endogenous oxytocin levels in adult titi monkeys. *American Journal of Primatology*, 80(10),  
912 e22907.
- 913
- 914 Yao, S., Becker, B., Zhao, W., Zhao, Z., Kou, J., Ma, X., Geng, Y., Ren, P. and Kendrick, K.M.,  
915 2018. Oxytocin modulates attention switching between interoceptive signals and external social  
916 cues. *Neuropsychopharmacology*, 43(2), pp.294-301.
- 917
- 918 Yuan, W., He, Z., Hou, W., Wang, L., Li, L., Zhang, J., Yang, Y., Jia, R., Qiao, H. and Tai, F.,  
919 2019. Role of oxytocin in the medial preoptic area (MPOA) in the modulation of paternal  
920 behavior in mandarin voles. *Hormones and Behavior*, 110, pp.46-55.
- 921
- 922 Young, L. J., & Wang, Z. (2004). The neurobiology of pair bonding. *Nature*  
923 *Neuroscience*, 7(10), 1048-1054.
- 924
- 925 Zhao, X., & Marler, C. A. (2014). Pair bonding prevents reinforcing effects of testosterone in  
926 male California mice in an unfamiliar environment. *Proceedings of the Royal Society of London*  
927 *B: Biological Sciences*, 281(1788), 20140985.
- 928
- 929 Zoratto, F., Sbriccoli, M., Martinelli, A., Glennon, J. C., Macrì, S., & Laviola, G. (2018).  
930 Intranasal oxytocin administration promotes emotional contagion and reduces aggression in a  
931 mouse model of callousness. *Neuropharmacology*, 143, 250-267.
- 932



**(A)**

***Pre-courtship aggression test***

*Focal male (F) is sexually naïve*

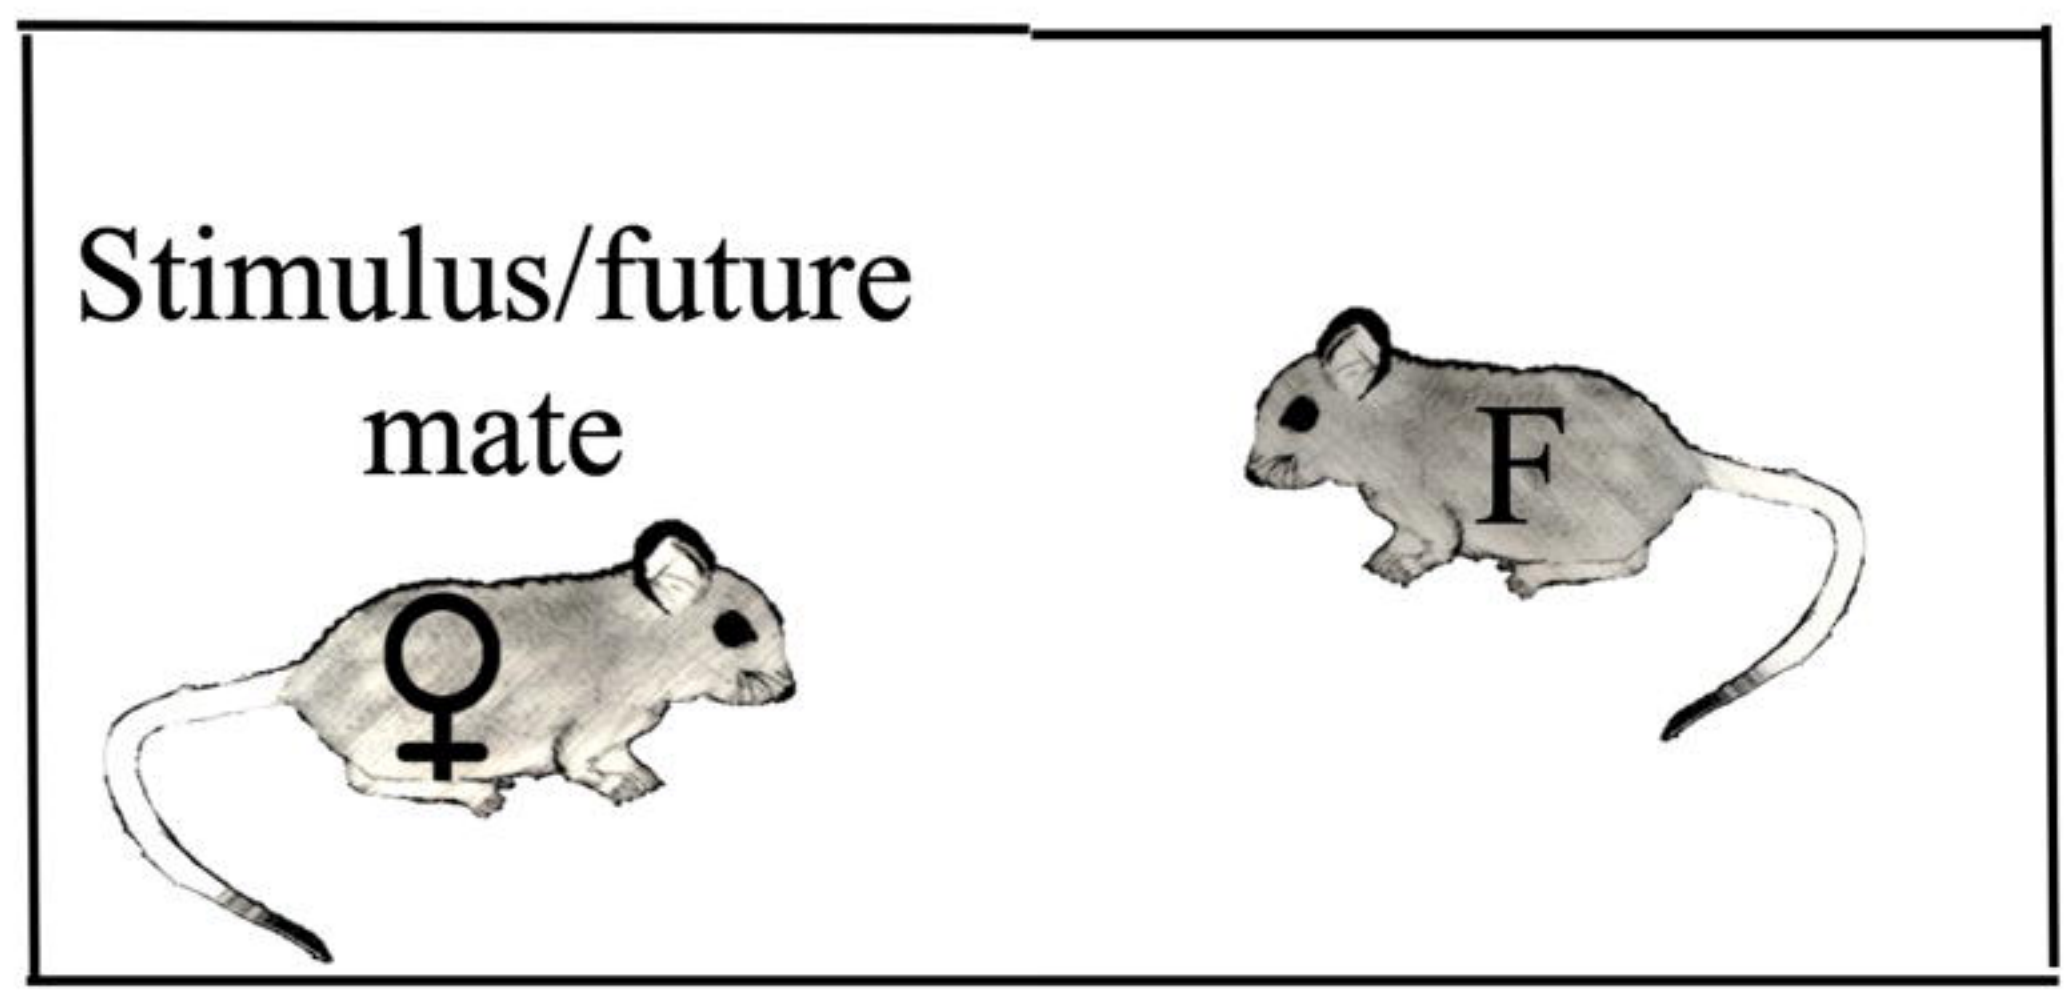

Neutral cage  
10 min test

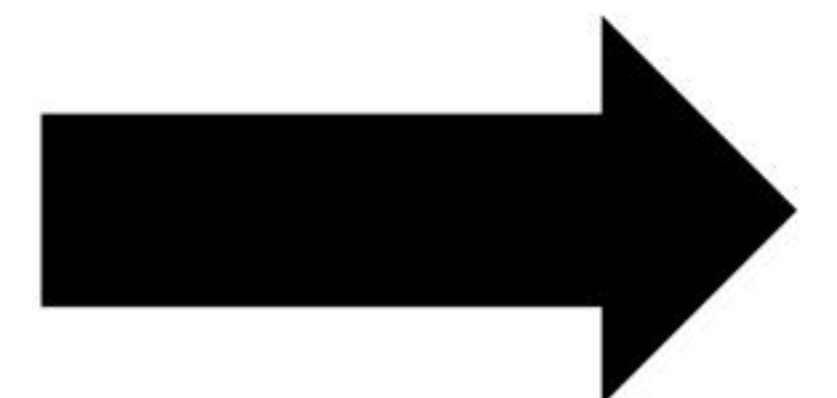

2 weeks

***Resident intruder aggression test***

*Focal male (F) is pair bonded*

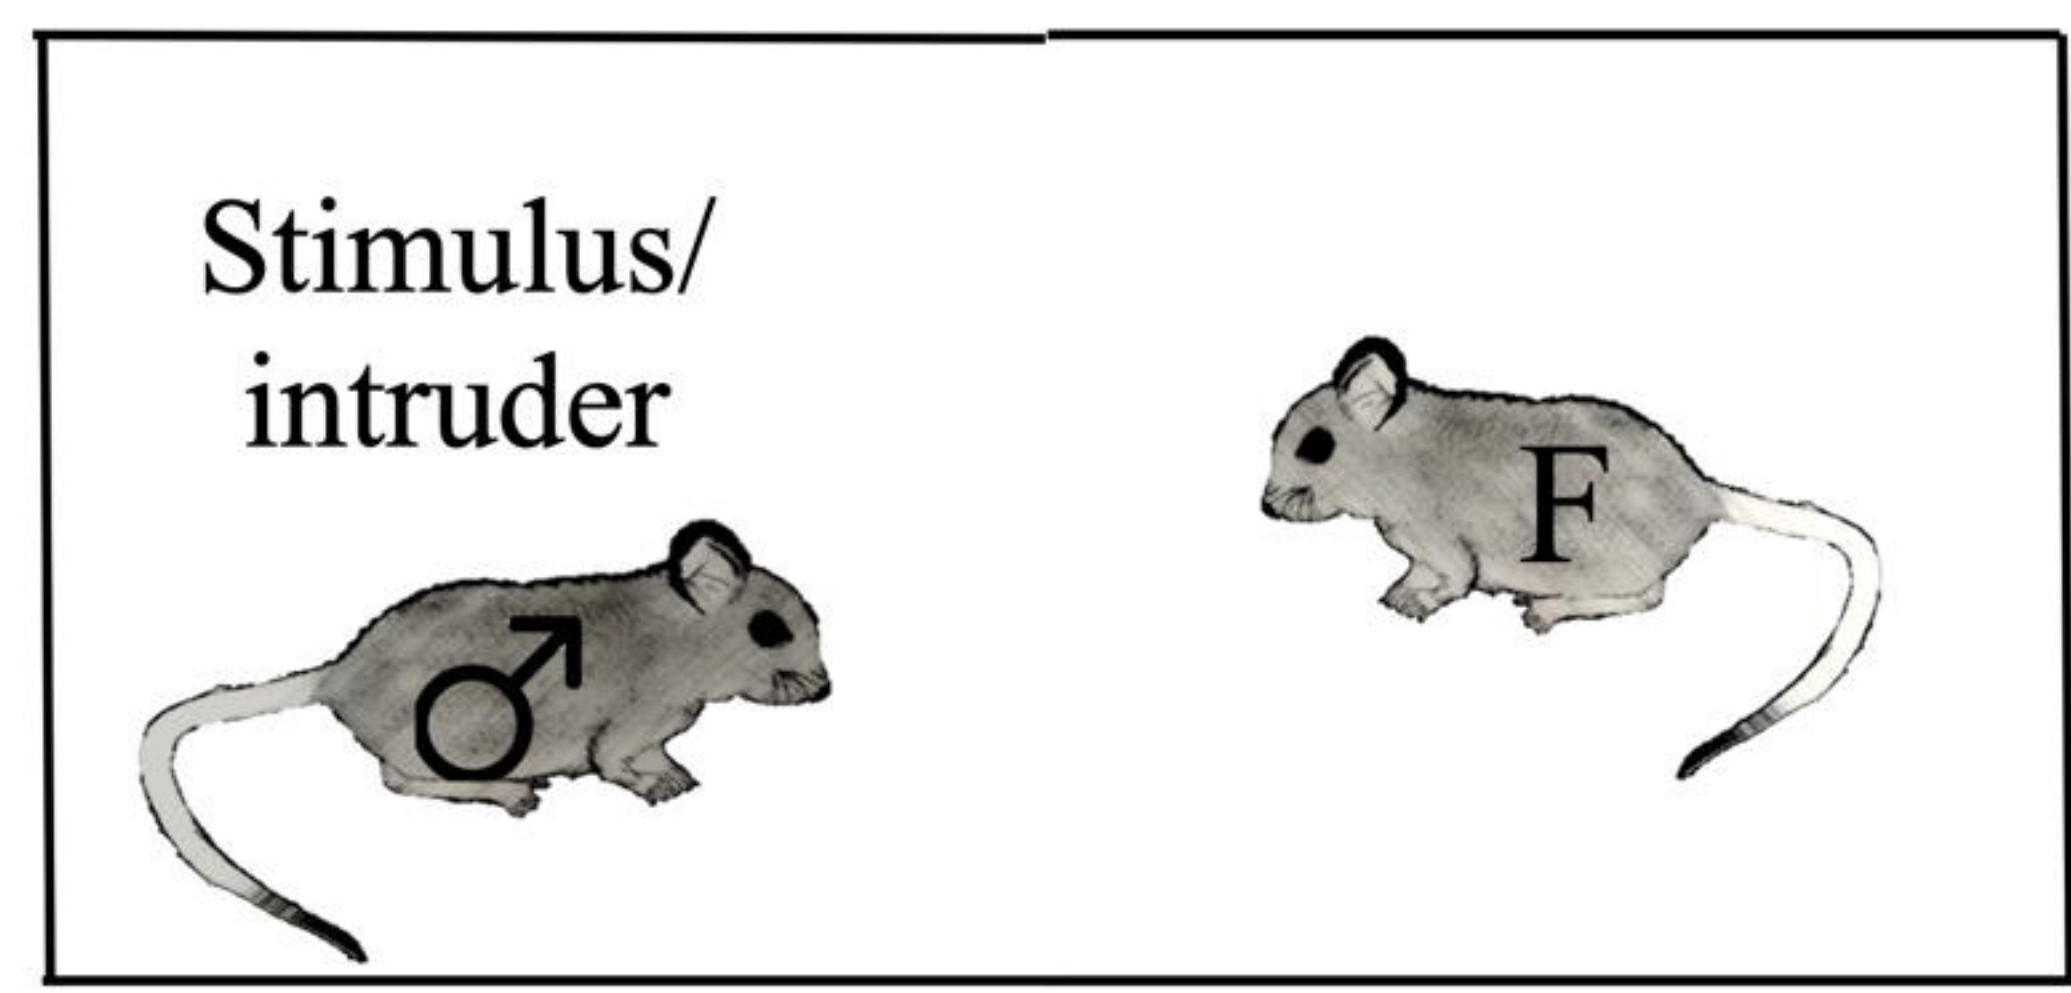

Home cage  
5 min test

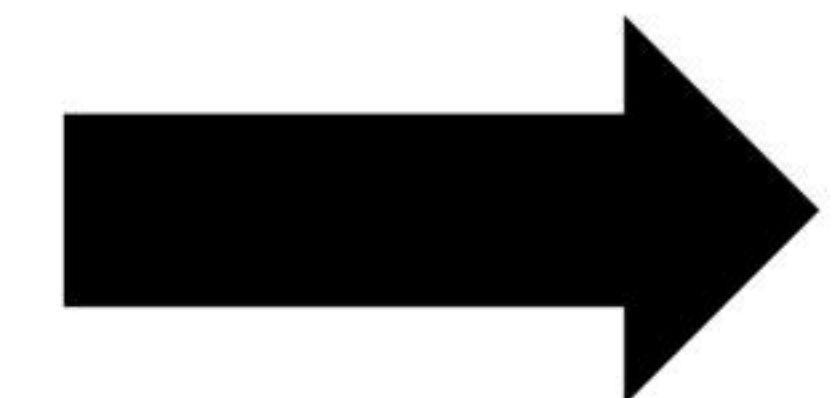

4-6 weeks

***Paternal care test***

*Focal male (F) is a new father*

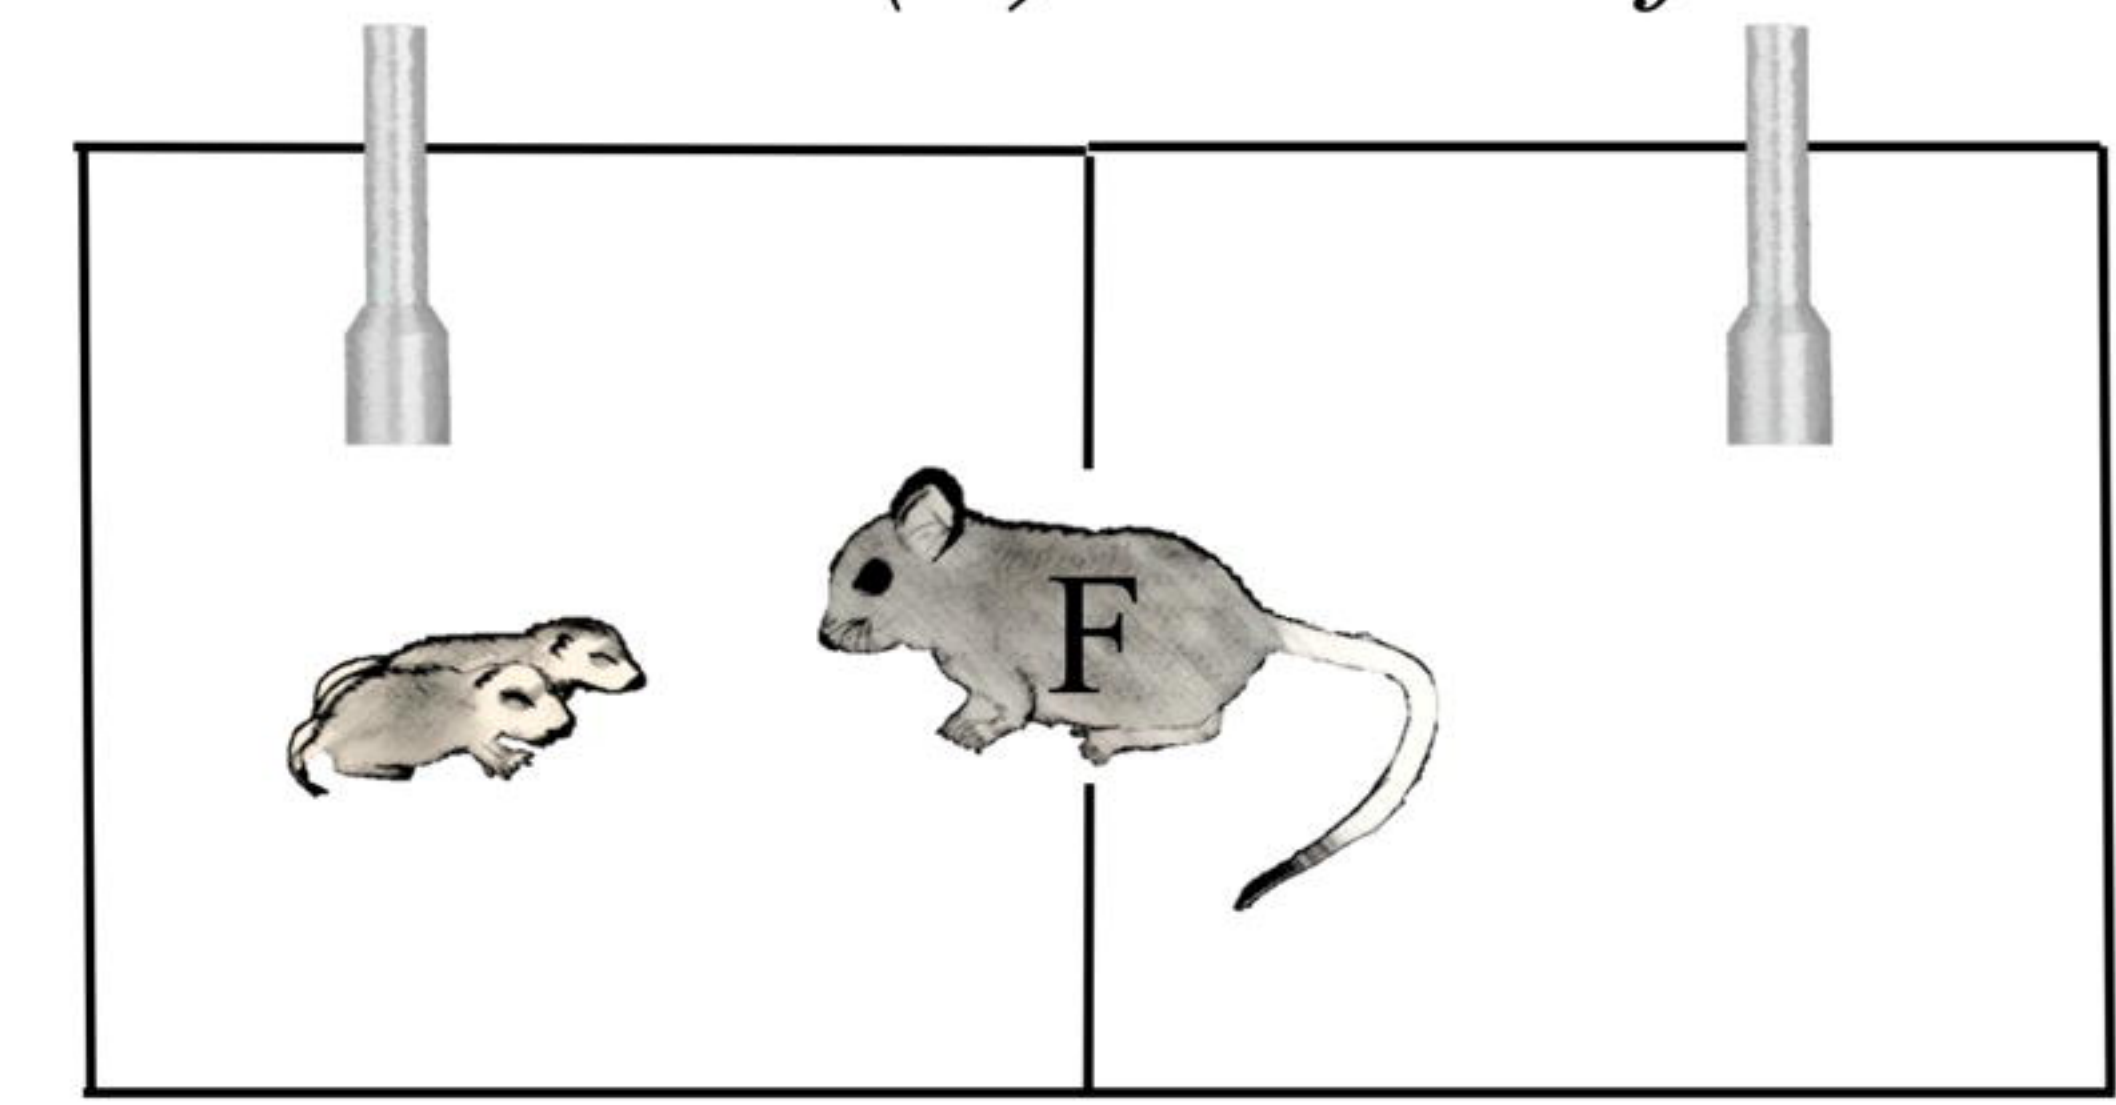

Neutral arena  
5 min test

**(B)**

**Pup whine**

**Paternal simple sweep**

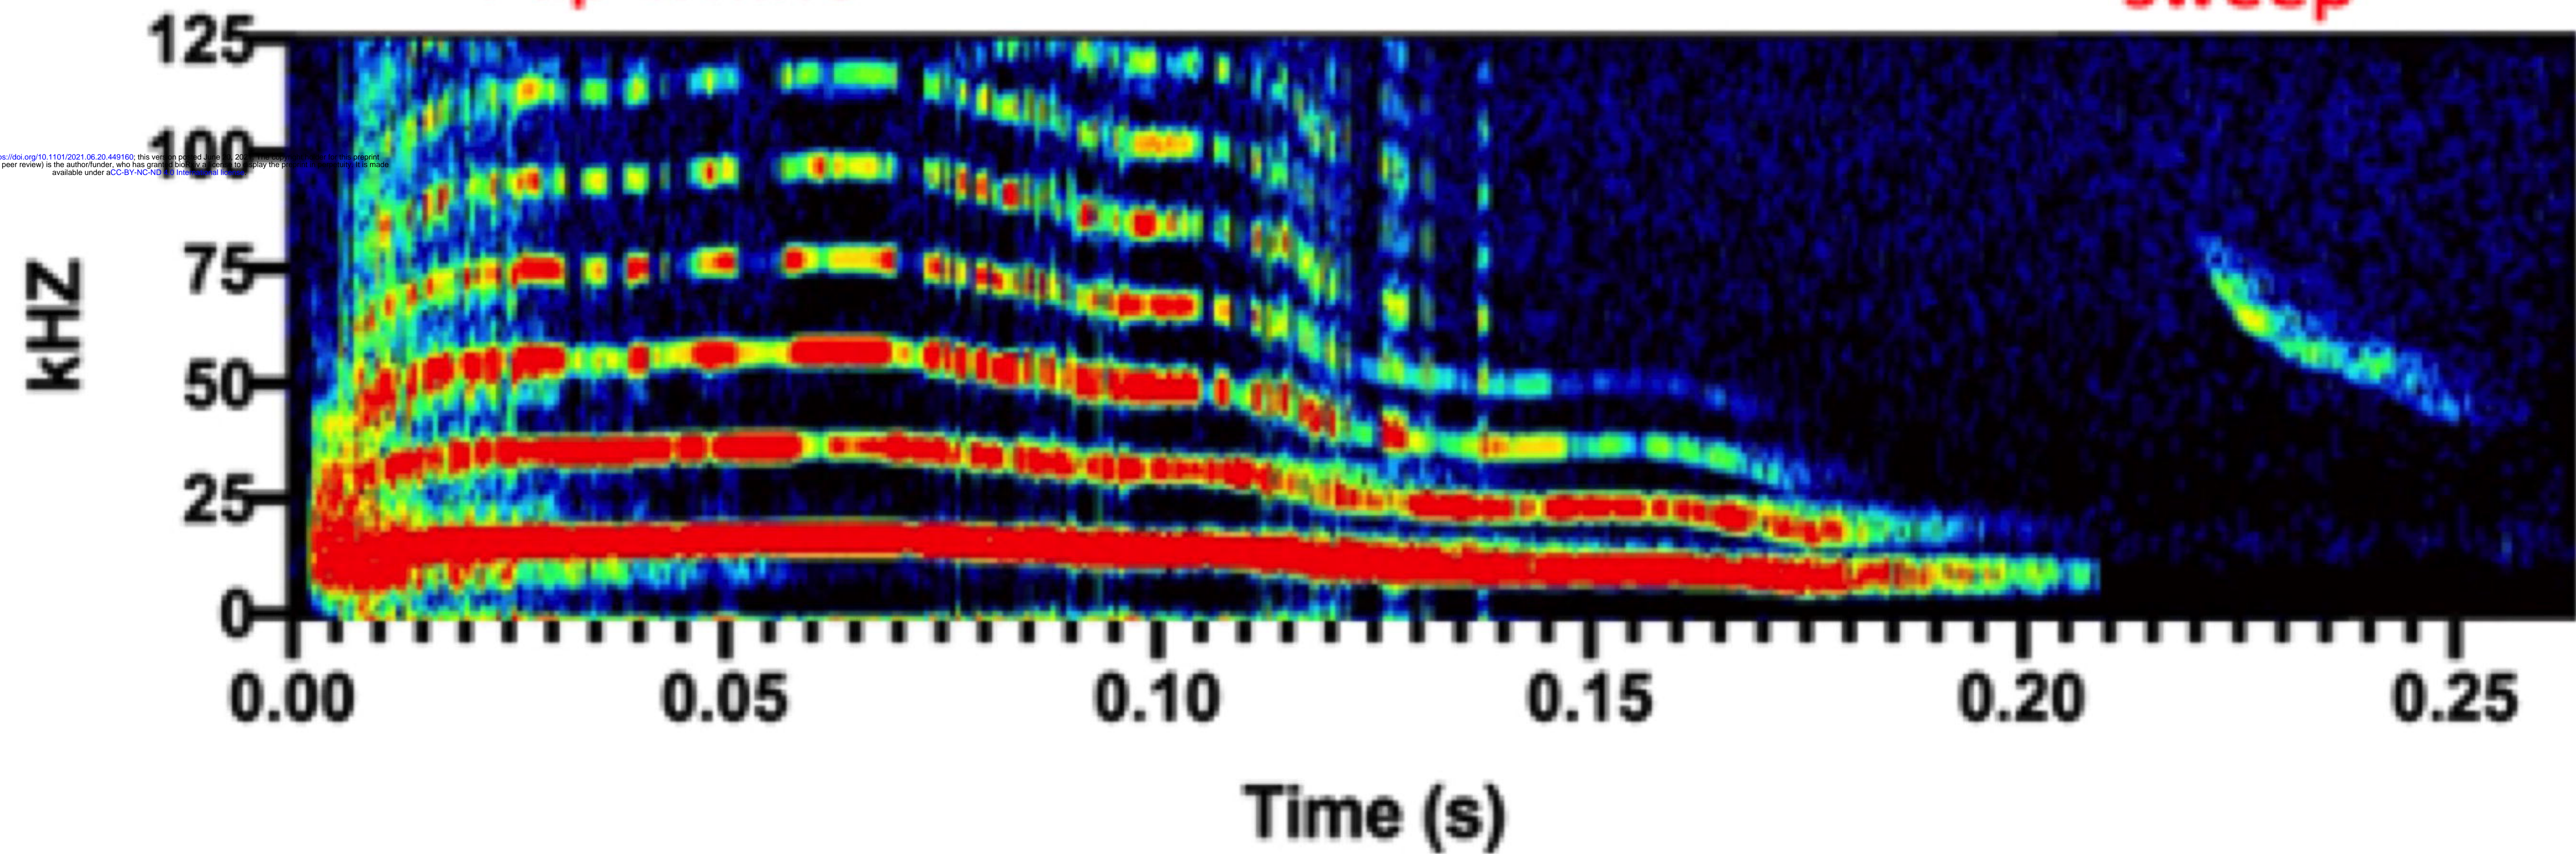



**A**

bioRxiv preprint doi: <https://doi.org/10.1101/2021.06.20.449160>; this version posted June 20, 2021. The copyright holder for this preprint (which was not certified by peer review) is the author/funder, who has granted bioRxiv a license to display the preprint in perpetuity. It is made available under aCC-BY-NC-ND 4.0 International license.

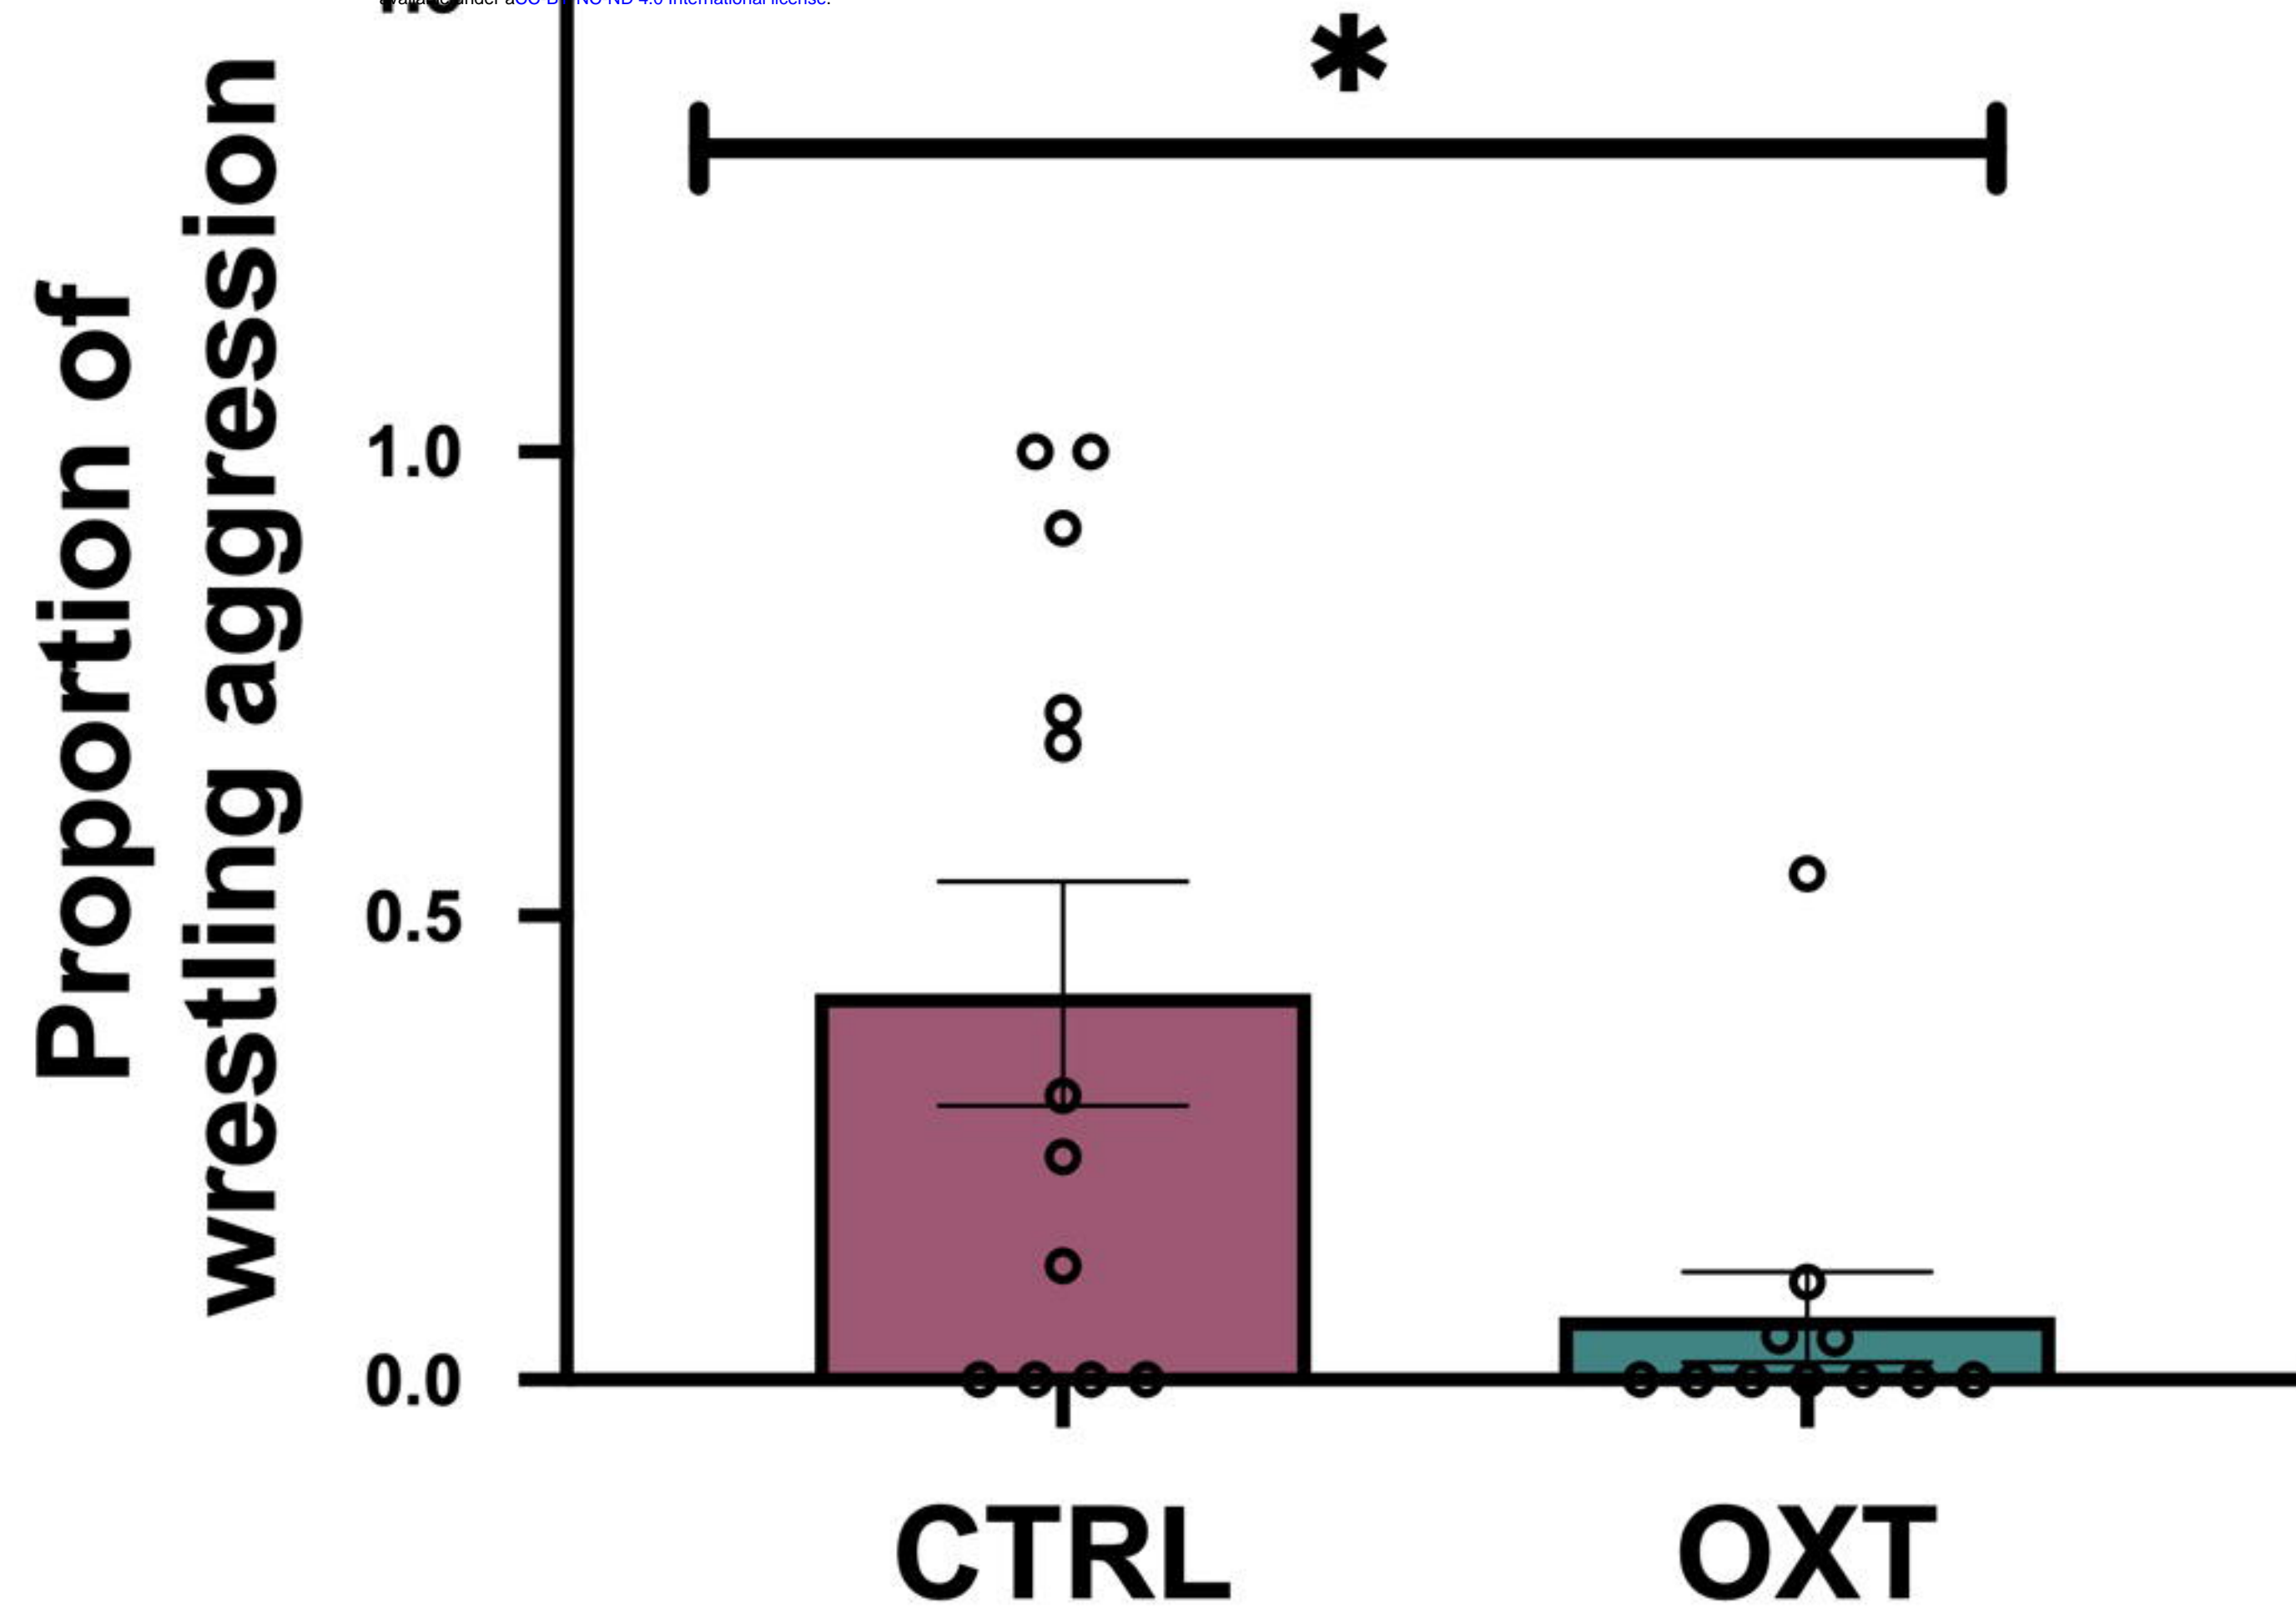**B**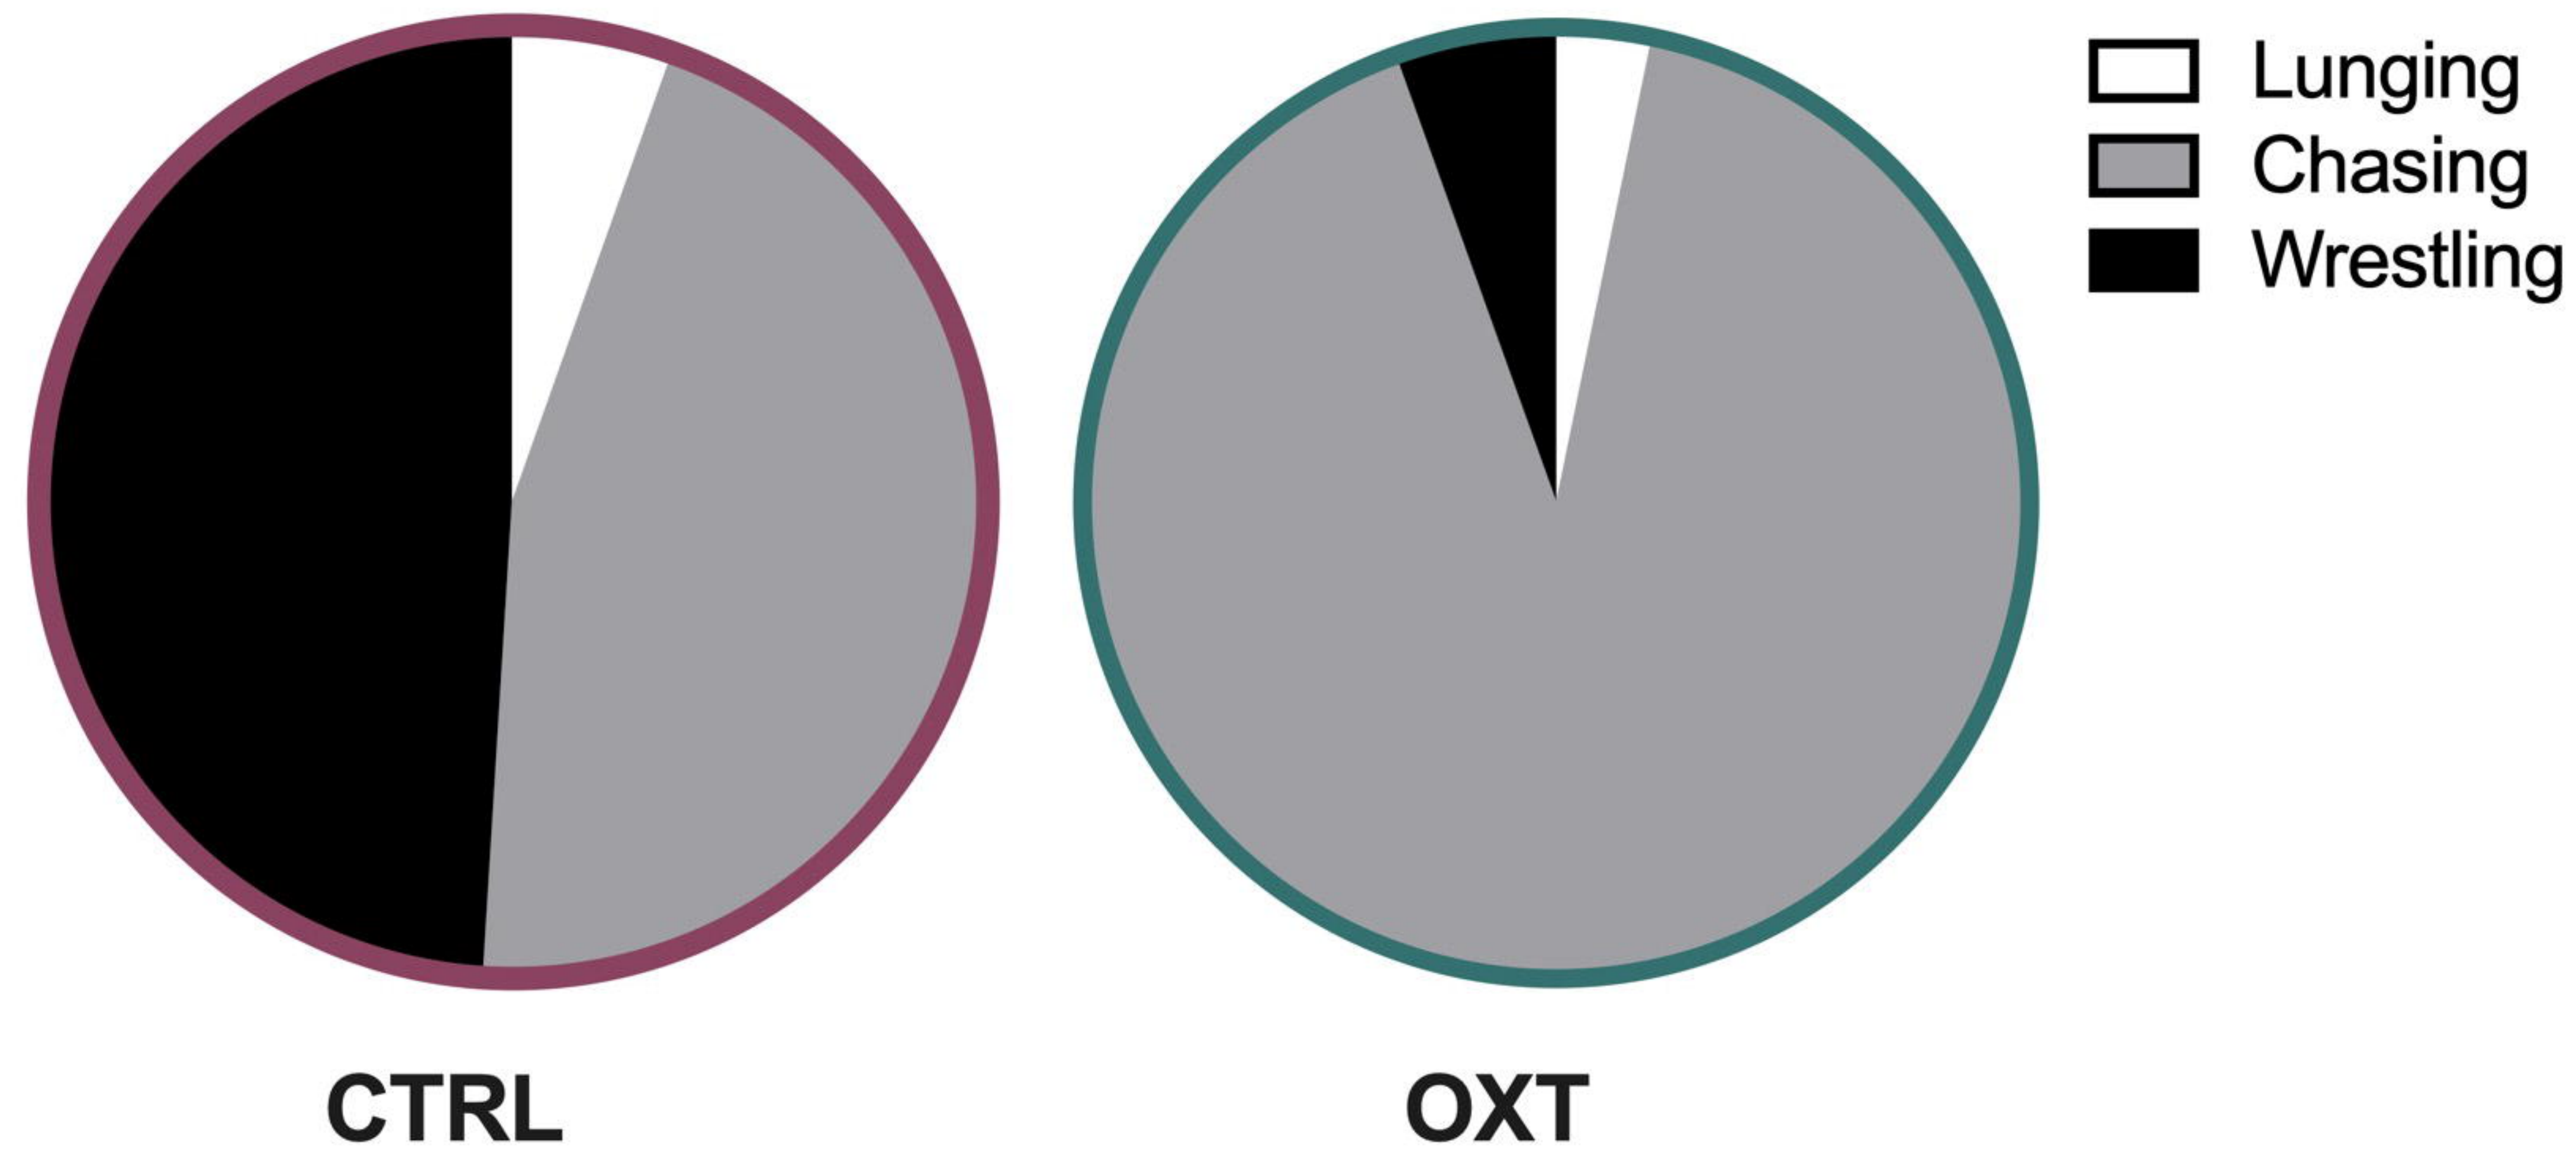

**A**

bioRxiv preprint doi: <https://doi.org/10.1101/2021.06.20.449160>; this version posted June 20, 2021. The copyright holder for this preprint (which was not certified by peer review) is the author/funder, who has granted bioRxiv a license to display the preprint in perpetuity. It is made available under aCC-BY-NC-ND 4.0 International license.

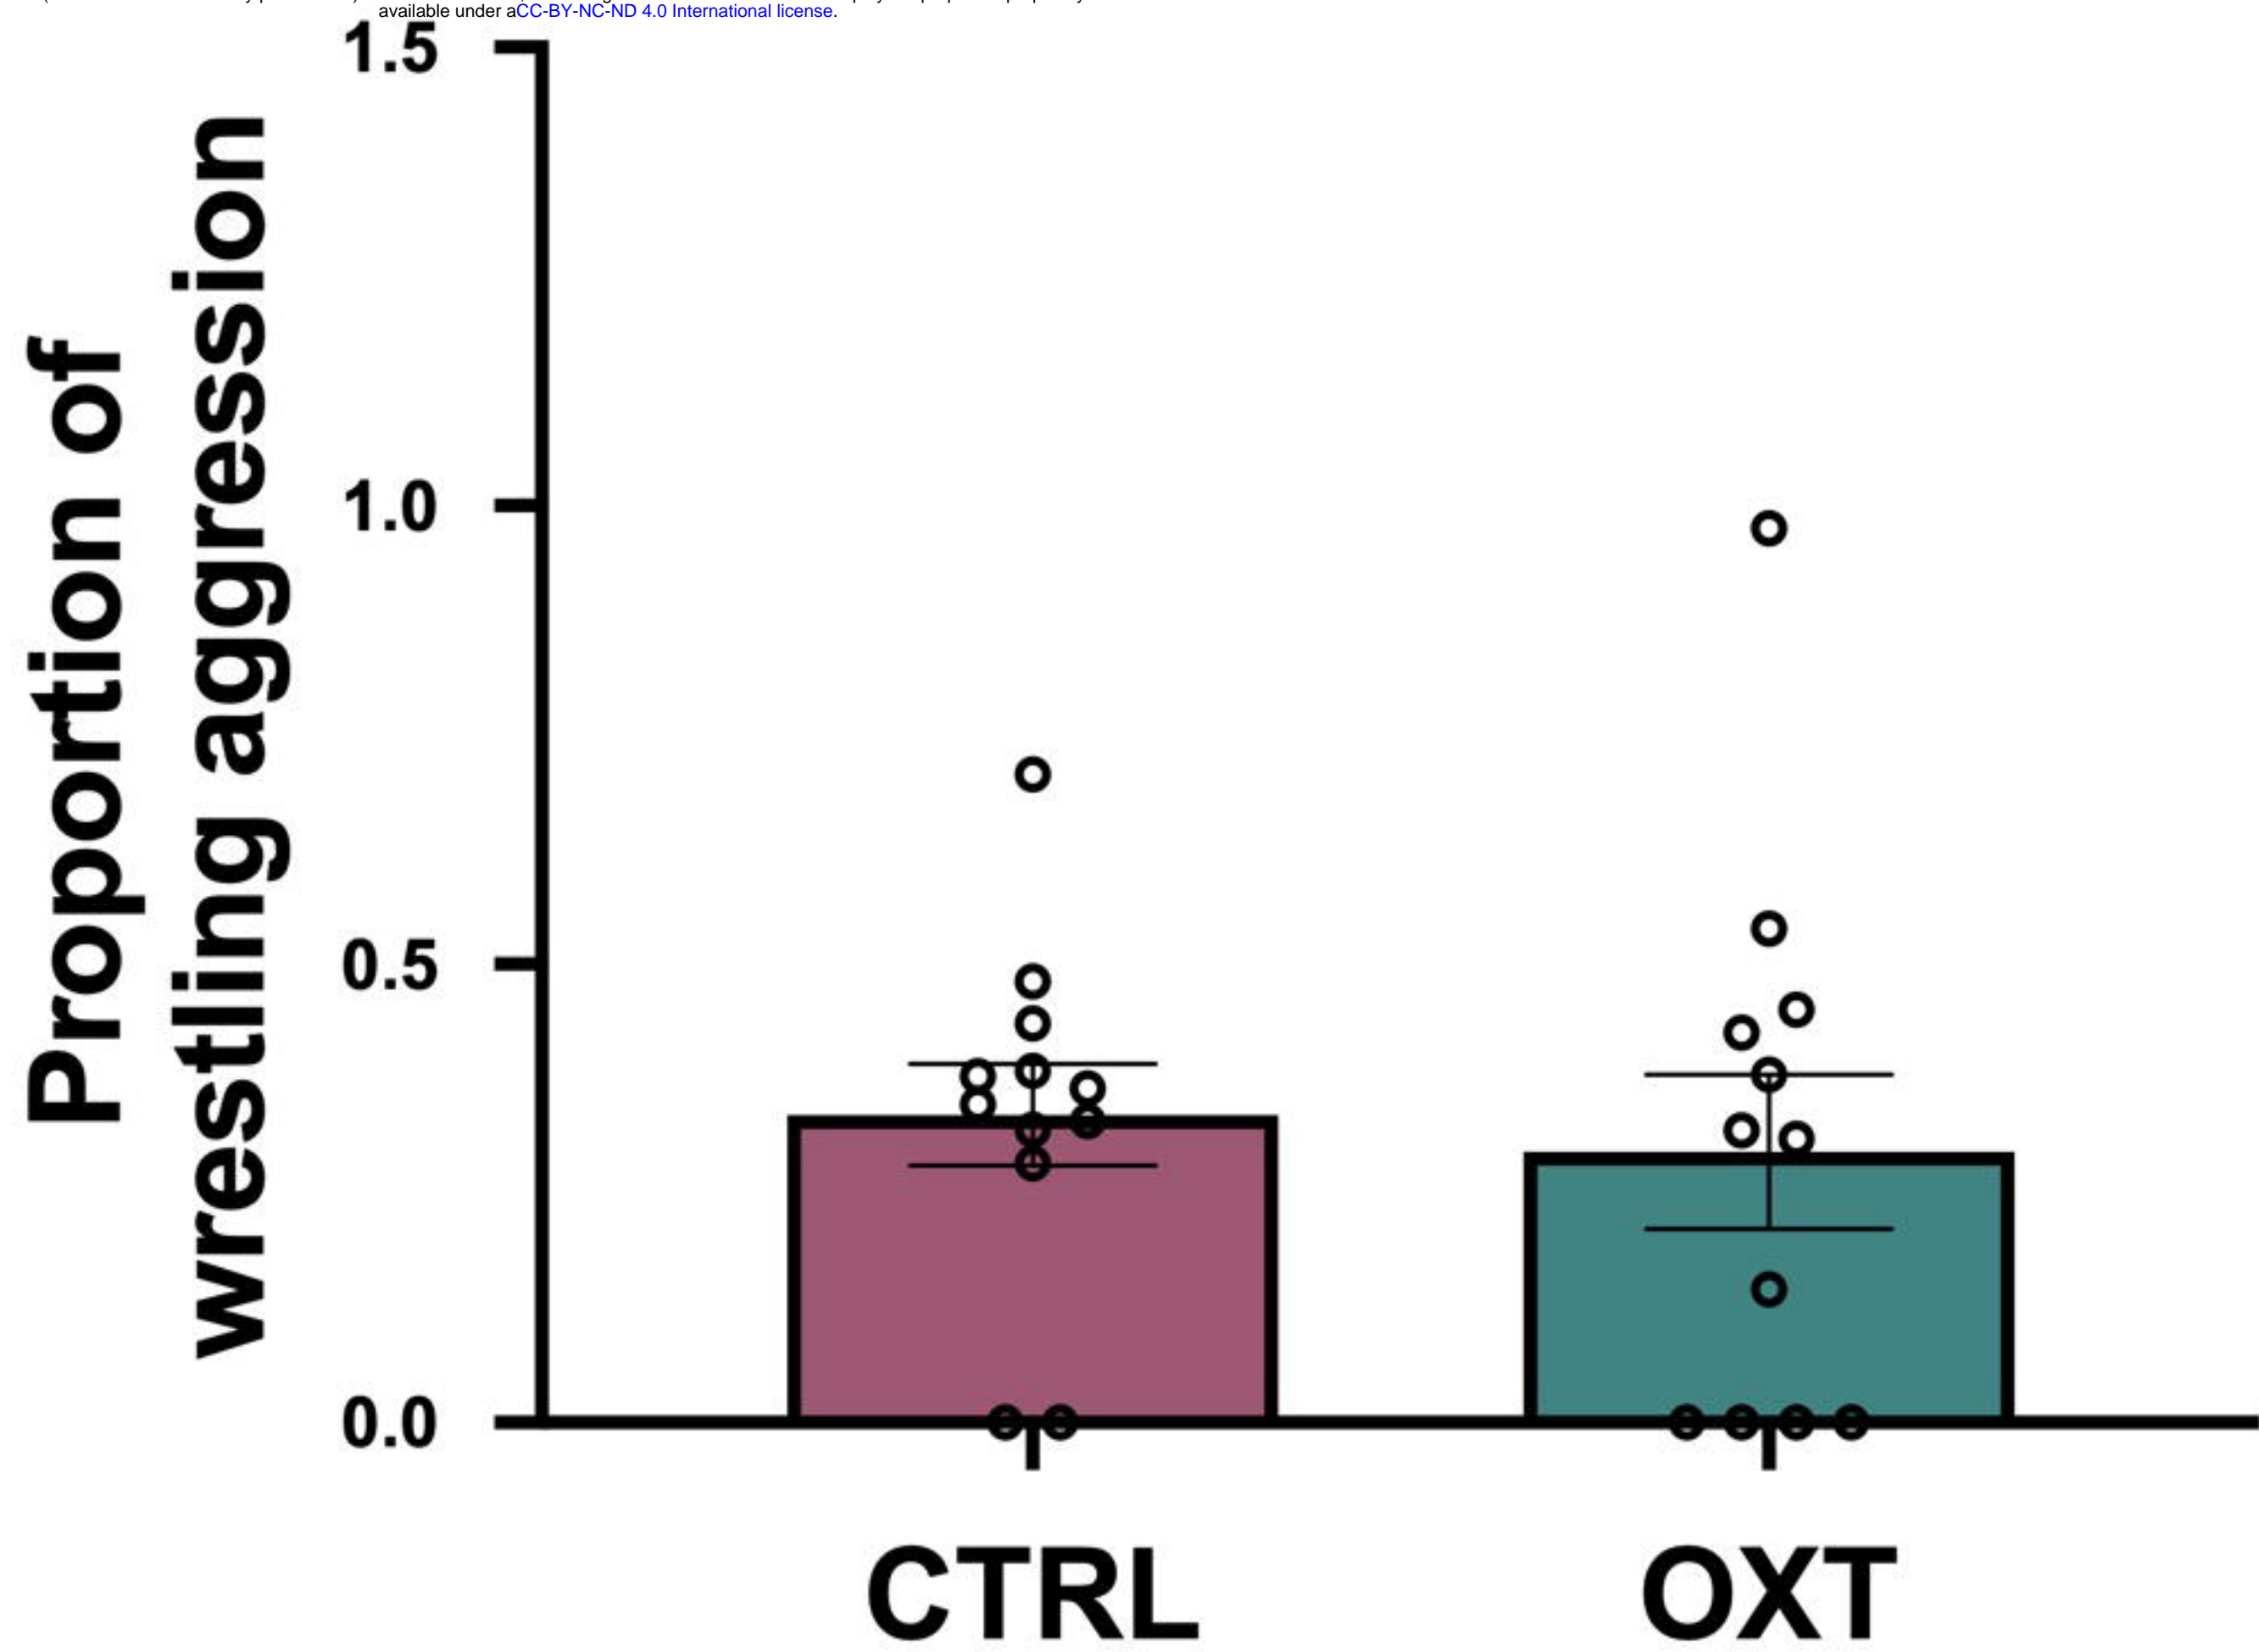**B**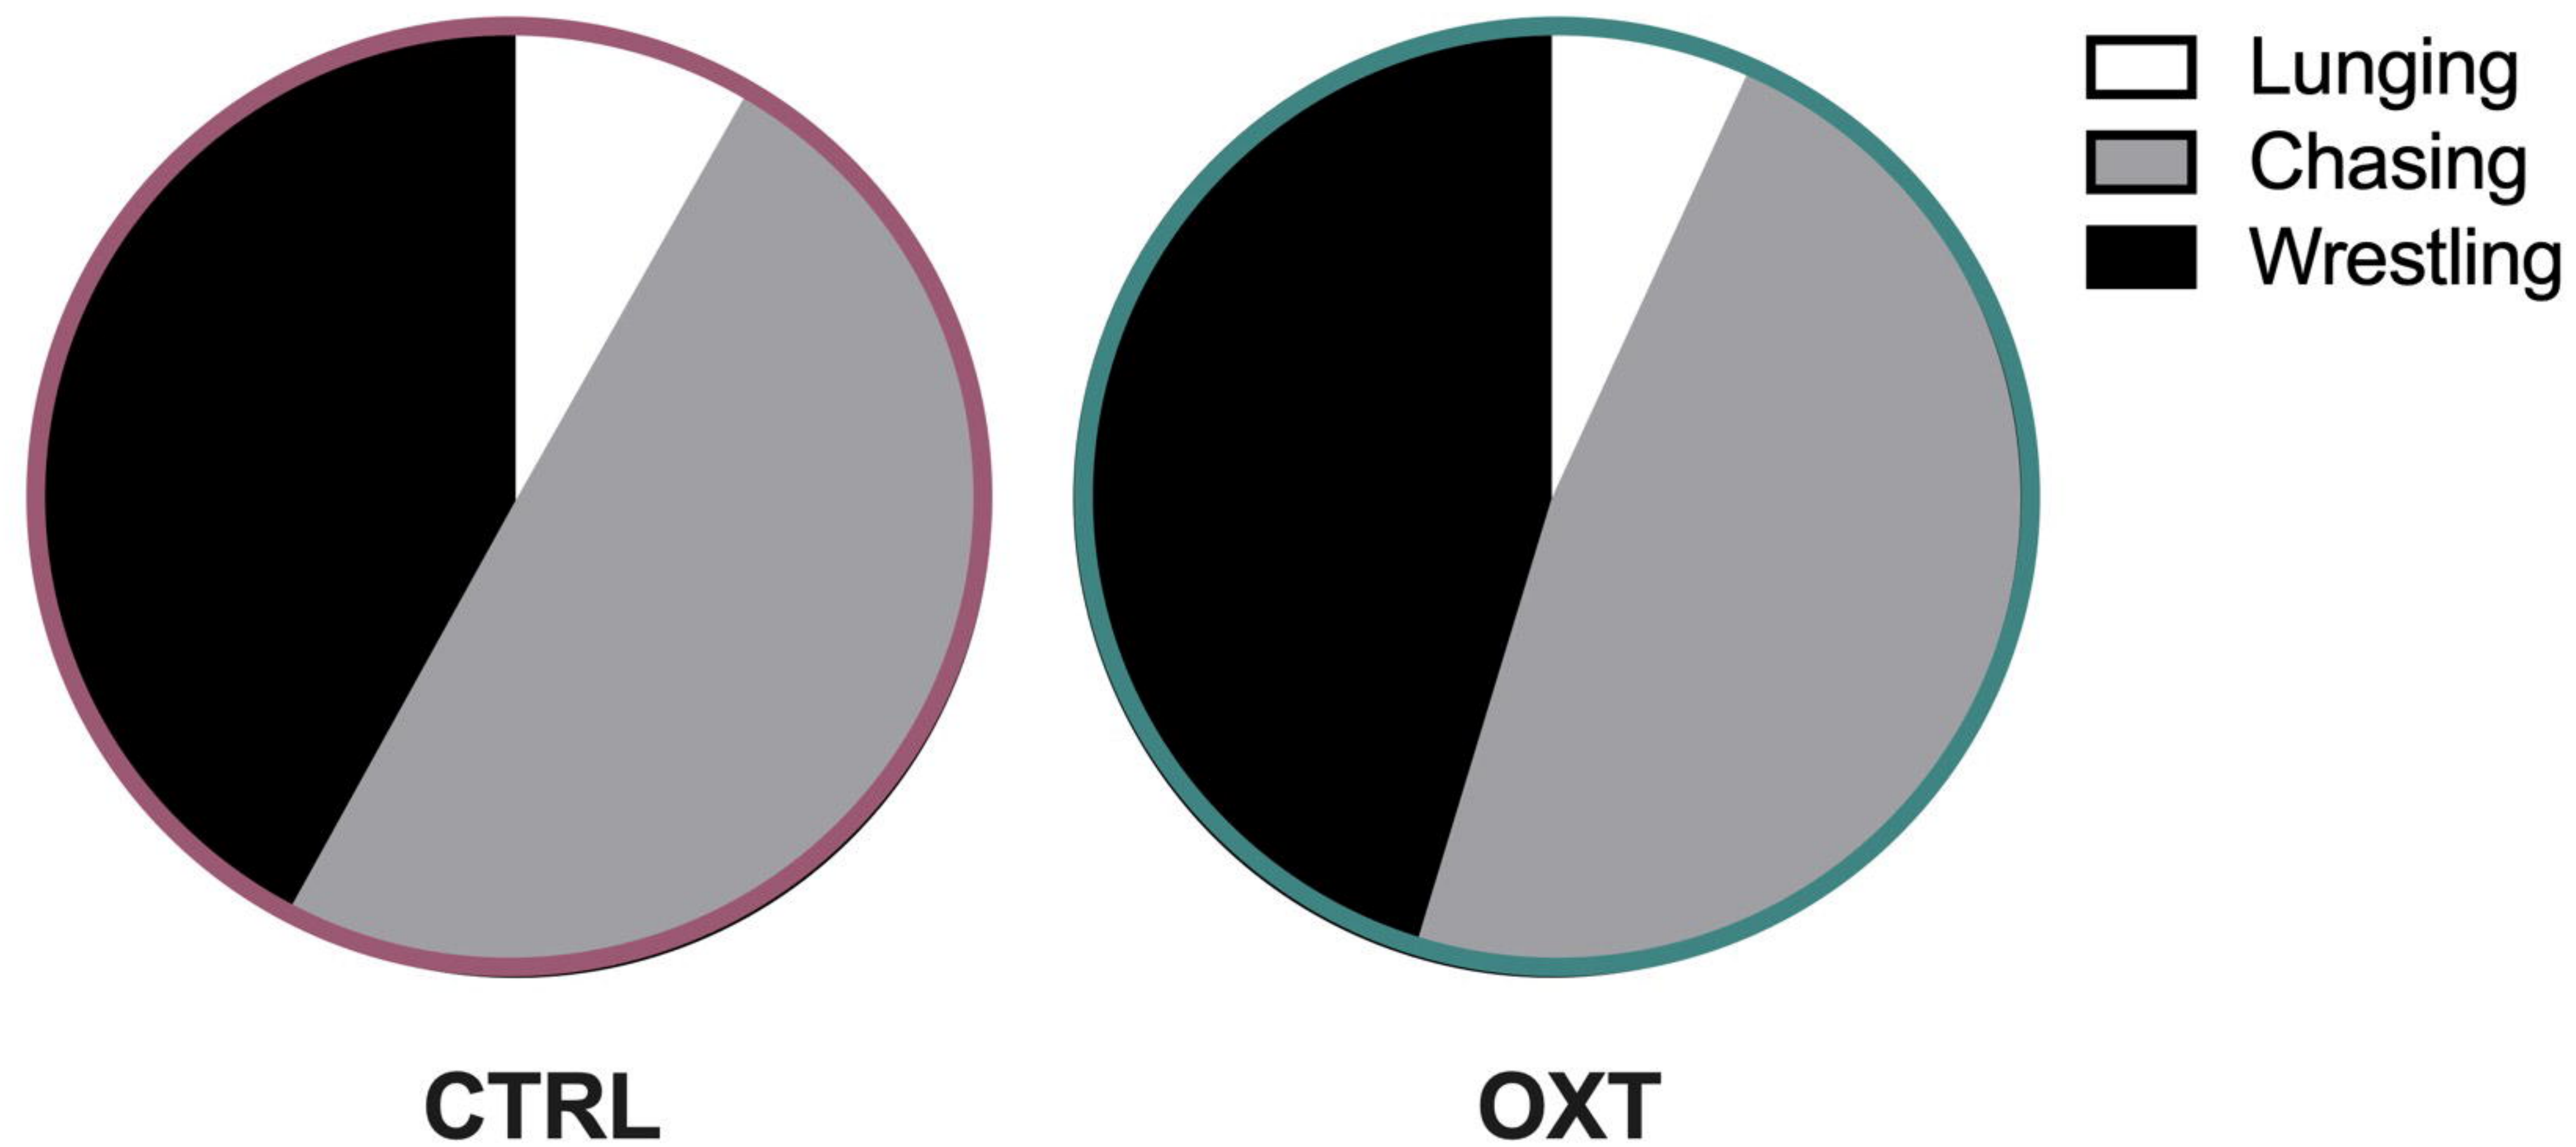



# Paternal Care

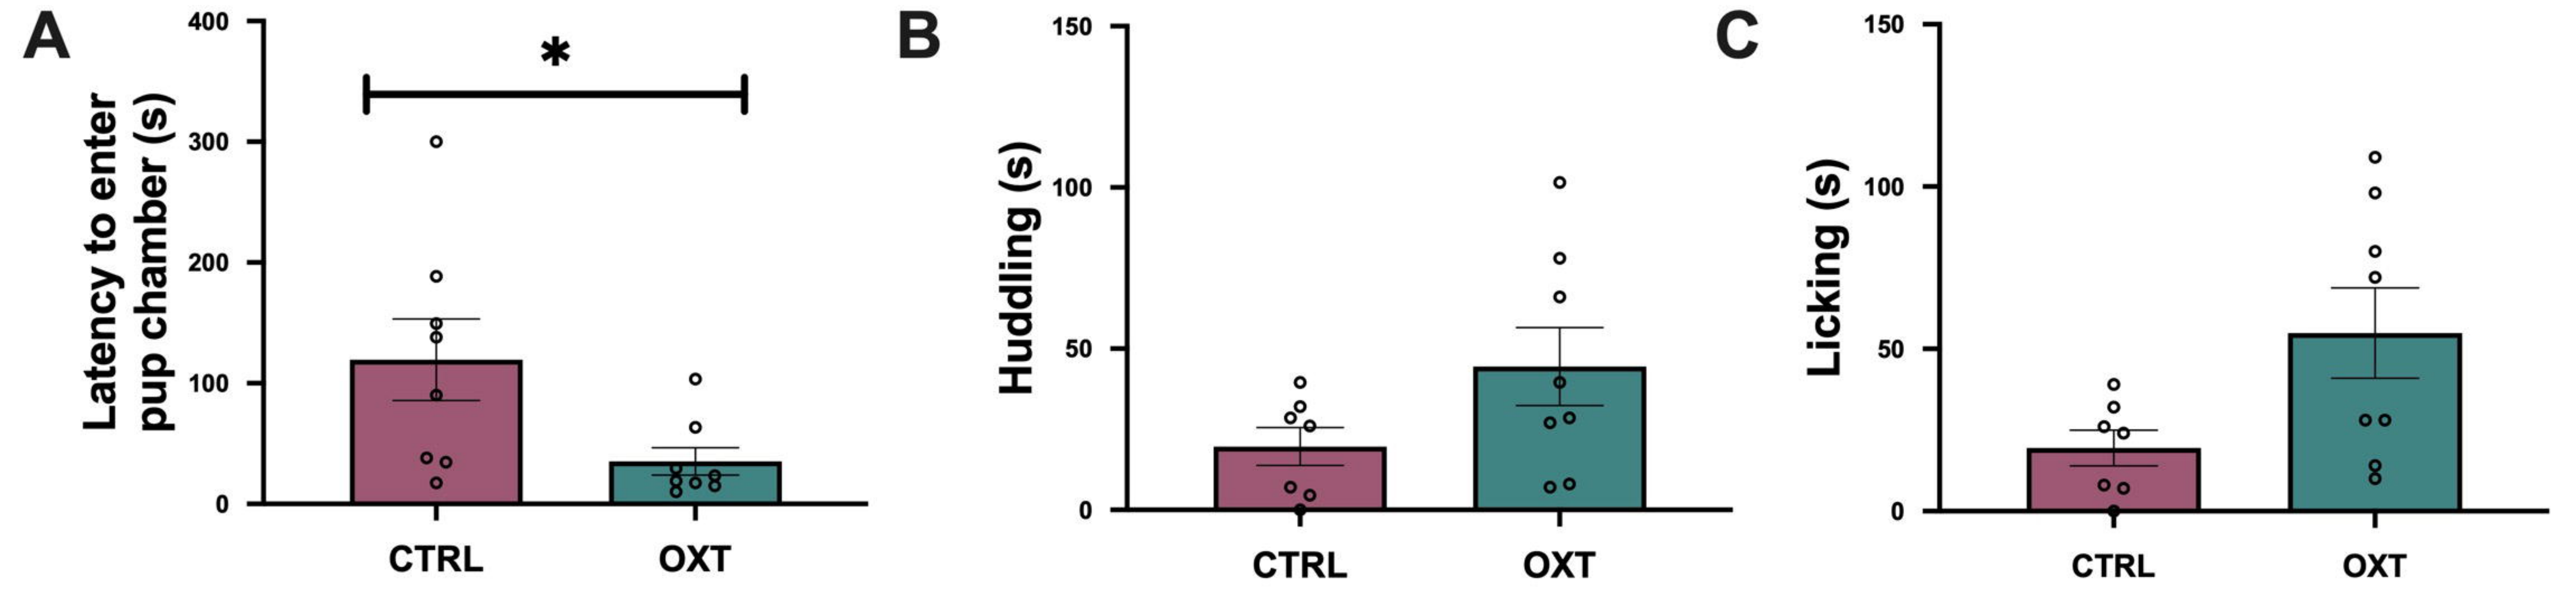

# Paternal and Pup USVs

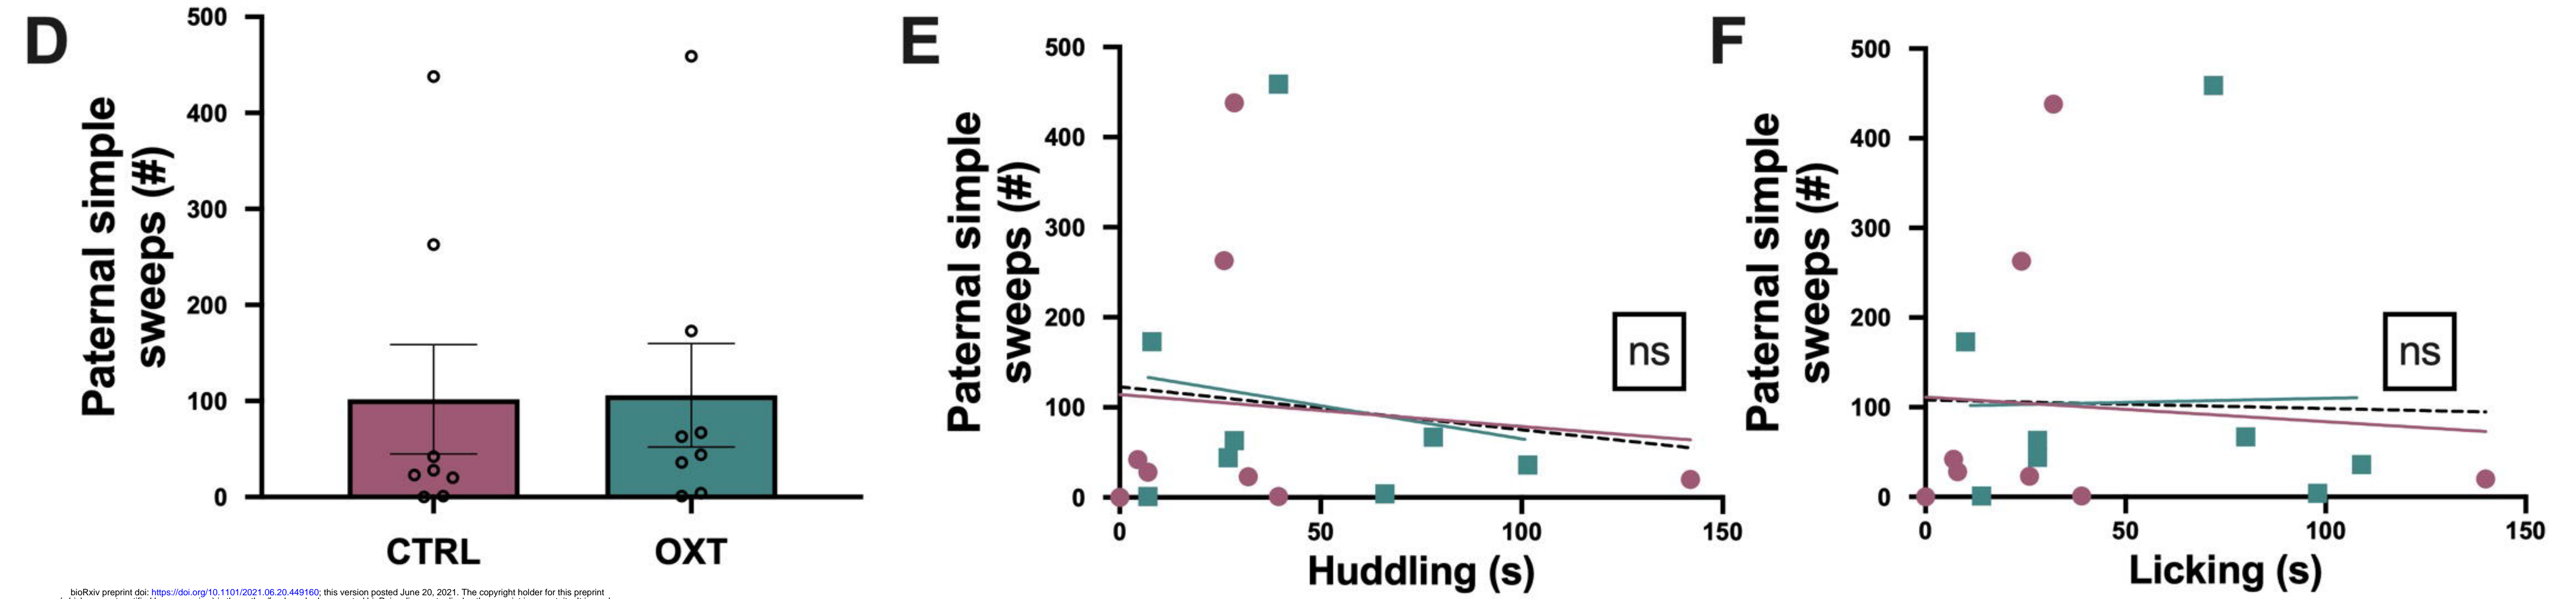

bioRxiv preprint doi: <https://doi.org/10.1101/2021.06.20.449160>; this version posted June 20, 2021. The copyright holder for this preprint (which was not certified by peer review) is the author/funder, who has granted bioRxiv a license to display the preprint in perpetuity. It is made available under aCC-BY-NC-ND 4.0 International license.

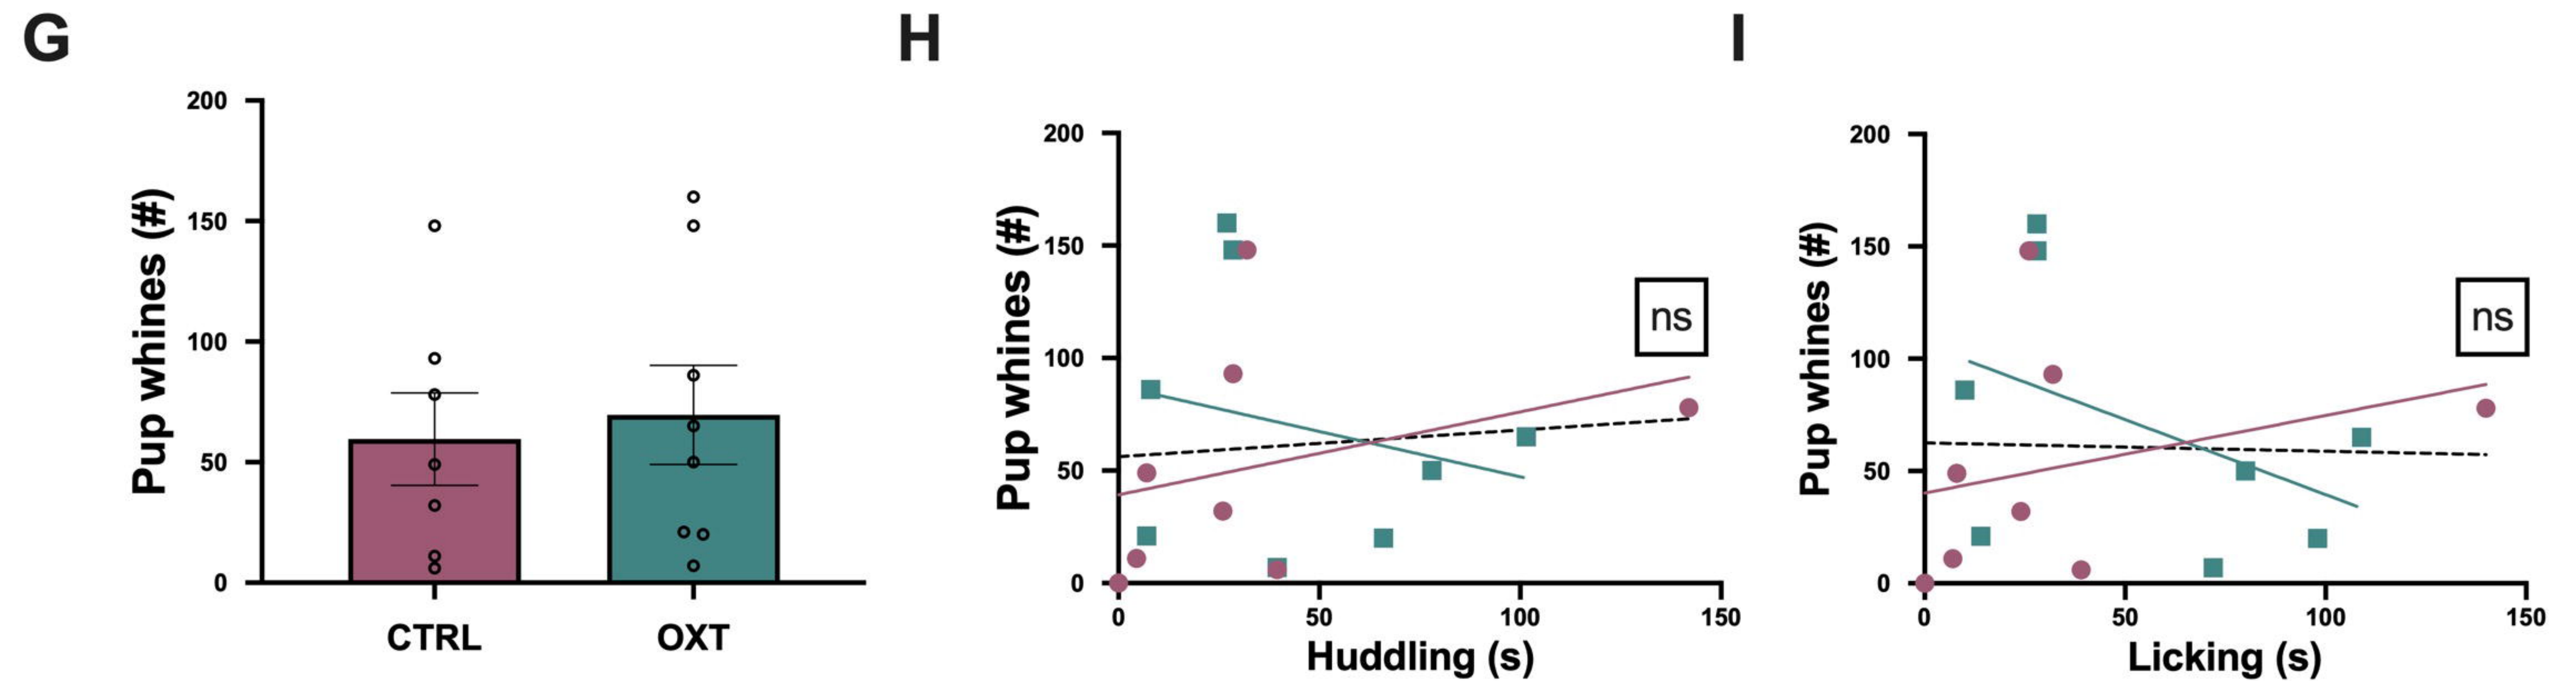

Source: https://www.biorxiv.org/content/10.1101/2021.06.20.449160v1.full.pdf
